# Supplementary material for: Comparative Genomics of Odorant Binding Proteins in Anopheles gambiae, Aedes aegypti, and Culex quinquefasciatus
Source: PubMed Central journal article supplement — Genome Biol Evol. 2013 Jan 3;5(1):163–80. doi: 10.1093/gbe/evs131 (PMC3595023; doi:10.1093/gbe/evs131), 2013-01-03
Supplement: supp_evs131_manoharan_suppl_tables_bis.pdf [file supp_evs131_manoharan_suppl_tables_bis.pdf]

**Supplementary Table 1a.** Complete list of OBP genes from *Anopheles gambiae* reported in this study. Alongside their identification and chromosomal locations, shown are their subfamilies, phylogenetic clusters and orthologues in *Aedes aegypti* and *Culex quinquefasciatus*. The four newly discovered genes by us are AgamOBP65-68 and are denoted by an (\*). The gene names used here do not completely coincide with the gene names in the were recently published work by Vieira & Rozas (2011). As an *addendum* to this Table, we are providing in supplementary Table 1b, a comparative analysis of the names between their study and ours. The last four genes were identified by Vieira & Rozas (2011) and were added to this Table at the last moment after renaming them AgamOBP69-72. †Two genes AgamOBP34 and AgamOBP37 share 100% sequence identity but are localized on distinct chromosome segments. We cannot resolve which of these two genes is the true orthologue of AaegOBP106. Two way (1:1) orthologues are indicated by a # sign. OBPs that did not clustered in a phylogenetic group were indicated as ‘unclassified’ in the ‘Cluster’ column.

| n° | ID         | Name       | Length | Chromosome | Start                                                                               | End      | Sub-family | Cluster             | Ortholog in <i>Ae. aegyptii</i> | Ortholog in <i>Culex</i> |
|----|------------|------------|--------|------------|-------------------------------------------------------------------------------------|----------|------------|---------------------|---------------------------------|--------------------------|
| 1  | AGAP003309 | AgamOBP1   | 144    | 2R         | 35643035                                                                            | 35644609 | Classic    | OS-E/OS-F           | AaegOBP1                        | CquiOBP1                 |
| 2  | AGAP003306 | AgamOBP2   | 157    | 2R         | 35434051                                                                            | 35434604 | Classic    | OS-E/OS-F           | AaegOBP60                       | CquiOBP3                 |
| 3  | AGAP001409 | AgamOBP3   | 153    | 2R         | 4210577                                                                             | 4212097  | Classic    | OS-E/OS-F           | AaegOBP38                       | CquiOBP2                 |
| 4  | AGAP010489 | AgamOBP4   | 150    | 3L         | 4997901                                                                             | 4998953  | Classic    | LUSH                | AaegOBP39                       | CquiOBP6                 |
| 5  | AGAP009629 | AgamOBP5   | 156    | 3R         | 37321107                                                                            | 37322204 | Classic    | LUSH                |                                 |                          |
| 6  | AGAP003530 | AgamOBP6   | 155    | 2R         | 39200905                                                                            | 39201673 | Classic    | OBP19a              | AaegOBP27                       | CquiOBP13                |
| 7  | AGAP001556 | AgamOBP7   | 154    | 2R         | 6152013                                                                             | 6154470  | Classic    | Pbprp1              | AaegOBP2                        | CquiOBP7                 |
| 8  | AGAP000279 | AgamOBP8   | 176    | X          | 5036744                                                                             | 5037431  | Classic    | <i>unclassified</i> |                                 |                          |
| 9  | AGAP000278 | AgamOBP9   | 139    | X          | 5035248                                                                             | 5036100  | Classic    | Obp99a              | AaegOBP22                       | CquiOBP43                |
| 10 | AGAP001189 | AgamOBP10  | 131    | 2R         | 1034139                                                                             | 1169444  | Classic    | mclassic6           | AaegOBP10                       | CquiOBP24                |
| 11 | AGAP002025 | AgamOBP11  | 192    | 2R         | 14069095                                                                            | 14069749 | Classic    | mclassic9           |                                 |                          |
| 12 | AGAP002188 | AgamOBP12  | 159    | 2R         | 17328044                                                                            | 17328912 | Classic    | <i>unclassified</i> |                                 |                          |
| 13 | AGAP002905 | AgamOBP13  | 149    | 2R         | 29134157                                                                            | 29134861 | Classic    | Pbprp2/5            | AaegOBP57                       | CquiOBP28                |
| 13 | AGAP002189 | AgamOBP14# | 188    | 2R         | 17331871                                                                            | 17332553 | Classic    | mclassic9           | AaegOBP18#                      | CquiOBP63#               |
| 15 | AGAP003307 | AgamOBP15  | 147    | 2R         | 35436449                                                                            | 35436969 | Classic    | OS-E/OS-F           | AaegOBP36                       | CquiOBP5                 |
| 16 |            | AgamOBP16  |        |            | Previously reported but same gene as AgamOBP15, hence not included in this analysis |          |            |                     |                                 |                          |
| 17 |            | AgamOBP17  |        |            | Previously reported but same gene as AgamOBP1, hence not included in this analysis  |          |            |                     |                                 |                          |
| 18 |            | AgamOBP18  |        |            | Previously reported but same gene as AgamOBP6, hence not included in this analysis  |          |            |                     |                                 |                          |
| 19 | AGAP004433 | AgamOBP19  | 137    | 2R         | 55987079                                                                            | 55987846 | Classic    | OBP19a              | AaegOBP56                       | CquiOBP12                |
| 20 | AGAP005208 | AgamOBP20  | 142    | 2L         | 12288238                                                                            | 12289440 | Classic    | OBP19a              | AaegOBP55                       | CquiOBP11                |
| 21 | AGAP008398 | AgamOBP21  | 131    | 3R         | 10317255                                                                            | 10317835 | Classic    | mclassic5           | AaegOBP8                        | CquiOBP23                |
| 22 | AGAP010409 | AgamOBP22  | 144    | 3L         | 2853087                                                                             | 2853645  | Classic    | mclassic8           | AaegOBP81                       | CquiOBP44                |
| 23 | AGAP012318 | AgamOBP23  | 131    | 3L         | 40168852                                                                            | 40169329 | Classic    | mclassic3           | AaegOBP9                        | CquiOBP22                |
| 24 | AGAP012319 | AgamOBP24  | 176    | 3L         | 40171315                                                                            | 40172237 | Classic    | mclassic2           | AaegOBP77                       | CquiOBP21                |

\*Newly discovered genes in this study.

# Only a two way (1:1) orthology has been established for these genes and not a three way (1:1:1) orthology.

†Two genes AgamOBP34 and AgamOBP37 share 100% sequence identity but are localized on distinct chromosome segments. We cannot resolve which of these two genes is the true orthologue of AaegOBP106.

nd : not determined

| n° | ID         | Name       | Length | Chromosome | Start    | End      | Sub-family         | Cluster             | Ortholog in <i>Ae. aegyptii</i> | Ortholog in <i>Culex</i> |
|----|------------|------------|--------|------------|----------|----------|--------------------|---------------------|---------------------------------|--------------------------|
| 25 | AGAP012320 | AgamOBP25  | 142    | 3L         | 40209434 | 40210326 | <i>Classic</i>     | mclassic3           | AaegOBP11                       | CquiOBP19                |
| 26 | AGAP012321 | AgamOBP26  | 131    | 3L         | 40213816 | 40214477 | <i>Classic</i>     | mclassic3           | AaegOBP35                       | CquiOBP20                |
| 27 | AGAP012323 | AgamOBP27  | 134    | 3L         | 40218226 | 40218764 | <i>Classic</i>     | mclassic1           | AaegOBP65                       | CquiOBP16                |
| 28 | AGAP012325 | AgamOBP28  | 134    | 3L         | 40221011 | 40221620 | <i>Classic</i>     | mclassic3           | AaegOBP12                       | CquiOBP18                |
| 29 | AGAP012331 | AgamOBP29  | 176    | 3L         | 40708383 | 40709402 | <i>Classic</i>     | Obp59a              | AaegOBP83                       | CquiOBP55                |
| 30 | AGAP011647 | AgamOBP30  | 289    | 3L         | 30753689 | 30754558 | <i>Two-domains</i> | matype4             |                                 |                          |
| 31 | AGAP010649 | AgamOBP31  | 313    | 3L         | 7968501  | 7969835  | <i>Two-domains</i> | matype3             | AaegOBP29                       |                          |
| 32 | AGAP000638 | AgamOBP32  | 320    | X          | 11413679 | 11414777 | <i>Two-domains</i> | matype4             | AaegOBP102                      |                          |
| 33 | AGAP000640 | AgamOBP33  | 334    | X          | 11416806 | 11417810 | <i>Two-domains</i> | <i>unclassified</i> |                                 |                          |
| 34 | AGAP000644 | AgamOBP34† | 311    | X          | 11428745 | 11429680 | <i>Two-domains</i> | matype2             | AaegOBP106                      |                          |
| 35 | AGAP000642 | AgamOBP35  | 275    | X          | 11422726 | 11423559 | <i>Two-domains</i> | matype2             |                                 |                          |
| 36 | AGAP000643 | AgamOBP36  | 275    | X          | 11426182 | 11427015 | <i>Two-domains</i> | matype2             |                                 |                          |
| 37 | AGAP000641 | AgamOBP37† | 311    | X          | 11419447 | 11420382 | <i>Two-domains</i> | matype2             | AaegOBP106                      |                          |
| 38 | AGAP000580 | AgamOBP38  | 336    | X          | 10205844 | 10206981 | <i>Two-domains</i> | <i>unclassified</i> |                                 |                          |
| 39 | AGAP002190 | AgamOBP39  | 246    | 2R         | 17333035 | 17333892 | <i>Two-domains</i> | matype1             | AaegOBP40                       | CquiOBP84                |
| 40 | AGAP002191 | AgamOBP40  | 282    | 2R         | 17334179 | 17335132 | <i>Two-domains</i> | matype1             |                                 |                          |
| 41 | AGAP005182 | AgamOBP41  | 279    | 2L         | 11685185 | 11686024 | <i>Two-domains</i> | <i>unclassified</i> |                                 |                          |
| 42 | AGAP009065 | AgamOBP42  | 288    | 3R         | 25310798 | 25311664 | <i>Two-domains</i> | <i>unclassified</i> |                                 |                          |
| 43 | AGAP009402 | AgamOBP43  | 333    | 3R         | 32225167 | 32226168 | <i>Two-domains</i> | matype4             |                                 | CquiOBP76                |
| 44 | AGAP010648 | AgamOBP44  | 327    | 3L         | 7964187  | 7965356  | <i>Two-domains</i> | matype3             |                                 |                          |
| 45 | AGAP010650 | AgamOBP45  | 356    | 3L         | 7970287  | 7971357  | <i>Two-domains</i> | matype3             |                                 |                          |
| 46 | AGAP007289 | AgamOBP46  | 202    | 2L         | 45014419 | 45015087 | <i>PlusC</i>       | mplus2              | AaegOBP48                       | CquiOBP108               |
| 47 | AGAP007287 | AgamOBP47  | 228    | 2L         | 45011203 | 45012023 | <i>PlusC</i>       | mplus1              |                                 |                          |
| 48 | AGAP007286 | AgamOBP48  | 200    | 2L         | 45008928 | 45009814 | <i>PlusC</i>       | mplus1              | AaegOBP42                       | CquiOBP106               |
| 49 | AGAP006075 | AgamOBP49  | 179    | 2L         | 26103215 | 26103894 | <i>PlusC</i>       | mplus9              | AaegOBP73                       | CquiOBP112               |
| 50 | AGAP006076 | AgamOBP50  | 166    | 2L         | 26104148 | 26104931 | <i>PlusC</i>       | mplus9              |                                 |                          |

\*Newly discovered genes in this study.

# Only a two way (1:1) orthology has been established for these genes and not a three way (1:1:1) orthology.

†Two genes AgamOBP34 and AgamOBP37 share 100% sequence identity but are localized on distinct chromosome segments. We cannot resolve which of these two genes is the true orthologue of AaegOBP106.

nd : not determined

| n° | ID         | Name       | Length | Chromosome | Start    | End      | Sub-family     | Cluster             | Ortholog in <i>Ae. aegyptii</i> | Ortholog in <i>Culex</i> |
|----|------------|------------|--------|------------|----------|----------|----------------|---------------------|---------------------------------|--------------------------|
| 51 | AGAP006077 | AgamOBP51  | 203    | 2L         | 26129377 | 26130091 | <i>PlusC</i>   | mplus9              |                                 |                          |
| 52 | AGAP006078 | AgamOBP52  | 170    | 2L         | 26130285 | 26131425 | <i>PlusC</i>   | mplus9              |                                 |                          |
| 53 | AGAP006079 | AgamOBP53  | 171    | 2L         | 26131618 | 26132453 | <i>PlusC</i>   | mplus9              |                                 |                          |
| 54 | AGAP006080 | AgamOBP54# | 181    | 2L         | 26133006 | 26133968 | <i>PlusC</i>   | mplus7              | AaegOBP69#                      | CquiOBP111#              |
| 55 | AGAP006081 | AgamOBP55  | 156    | 2L         | 26134275 | 26135119 | <i>PlusC</i>   | mplus10             |                                 |                          |
| 56 | AGAP011367 | AgamOBP56  | 235    | 3L         | 22025830 | 22026752 | <i>PlusC</i>   | mplus11             | AaegOBP26                       | CquiOBP102               |
| 57 | AGAP011368 | AgamOBP57  | 204    | 3L         | 22028532 | 22029250 | <i>PlusC</i>   | mplus11             | AaegOBP25                       | CquiOBP104               |
| 58 | AGAP006074 | AgamObp58  | 286    | 2L         | 26101764 | 26135649 | <i>PlusC</i>   | mplus6              | AaegOBP5                        | CquiOBP109               |
| 59 | AGAP006760 | AgamOBP59  | 155    | 2L         | 37923144 | 37923831 | <i>PlusC</i>   | <i>unclassified</i> |                                 |                          |
| 60 | AGAP007281 | AgamOBP60# | 198    | 2L         | 44998234 | 44999054 | <i>PlusC</i>   | mplus4              | AaegOBP51#                      | CquiOBP110#              |
| 61 | AGAP007282 | AgamOBP61  | 204    | 2L         | 44999450 | 45000275 | <i>PlusC</i>   | mplus4              |                                 |                          |
| 62 | AGAP002556 | AgamOBP62  | 174    | 2R         | 22787889 | 22792798 | <i>Classic</i> | Pbprp4              | AaegOBP20                       | CquiOBP14                |
| 63 | AGAP012322 | AgamOBP63  | 135    | 3L         | 40217381 | 40217853 | <i>Classic</i> | mclassic4           | AaegOBP61                       | CquiOBP17                |
| 64 | AGAP012324 | AgamOBP64  | 142    | 3L         | 40219631 | 40220284 | <i>Classic</i> | mclassic1           | AaegOBP15                       | CquiOBP15                |
| 65 | AGAP006759 | AgamOBP65* | 179    | 2L         | 37922005 | 37922885 | <i>PlusC</i>   | <i>unclassified</i> |                                 |                          |
| 66 | AGAP007283 | AgamOBP66* | 212    | 2L         | 45000529 | 45001413 | <i>PlusC</i>   | mplus10             |                                 |                          |
| 67 | AGAP012659 | AgamOBP67* | 204    | UNKN       | 22699010 | 22699835 | <i>PlusC</i>   | mplus4              |                                 |                          |
| 68 | AGAP012658 | AgamOBP68* | 212    | UNKN       | 22697816 | 22698745 | <i>PlusC</i>   | mplus10             |                                 |                          |
| 69 | AGAP013182 | AgamOBP69  | 229    | 2R         | 21343359 | 21344048 | <i>PlusC</i>   | <i>nd</i>           |                                 |                          |
| 70 | AGAP006368 | AgamOBP70  | 200    | 2L         | 30543243 | 30547869 | <i>PlusC</i>   | <i>nd</i>           |                                 | CquiOBP114               |
| 71 | AGAP012867 | AgamOBP71  | 228    | UNKN       | 35107623 | 35108585 | <i>PlusC</i>   | <i>nd</i>           |                                 |                          |
| 72 | AGAP012714 | AgamOBP72  | 121    | UNKN       | 24728945 | 24729493 | <i>Classic</i> | <i>nd</i>           |                                 |                          |

\*Newly discovered genes in this study.

# Only a two way (1:1) orthology has been established for these genes and not a three way (1:1:1) orthology.

†Two genes AgamOBP34 and AgamOBP37 share 100% sequence identity but are localized on distinct chromosome segments. We cannot resolve which of these two genes is the true orthologue of AaegOBP106.

*nd* : not determined

**Supplementary Table 1b.** OBP gene names for *Anopheles gambiae*. Shown is the correspondence between the OBP gene names used in this study and the names used in the Vectorbase, Xu et al. 2003 and very recent work of Vieira & Rozas (2011).

| n° | Gene identifier in Xu et al. (2003) | Corresponding vectorbase ID | Name in vectorbase | Name as defined in Xu et al. 2003 | Name in (Vieira & Rozas. 2011) | Name in (Manoharan et al. 2012) | Comment                            |
|----|-------------------------------------|-----------------------------|--------------------|-----------------------------------|--------------------------------|---------------------------------|------------------------------------|
| 1  | AY146721                            | AGAP003309                  | AgamOBP17          | AgamOBP1                          | AgamOBP1                       | AgamOBP1                        | Gene name difference in vectorbase |
| 2  | AY146719                            | AGAP003306                  | AgamOBP2           | AgamOBP2                          | AgamOBP2                       | AgamOBP2                        |                                    |
| 3  | AY146745                            | AGAP001409                  | AgamOBP3           | AgamOBP3                          | AgamOBP3                       | AgamOBP3                        |                                    |
| 4  | AY146731                            | AGAP010489                  | AgamOBP4           | AgamOBP4                          | AgamOBP4                       | AgamOBP4                        |                                    |
| 5  | AY146729                            | AGAP009629                  | AgamOBP5           | AgamOBP5                          | AgamOBP5                       | AgamOBP5                        |                                    |
| 6  | AY146725                            | AGAP003530                  | AgamOBP6           | AgamOBP6                          | AgamOBP6                       | AgamOBP6                        |                                    |
| 7  | AY146742                            | AGAP001556                  | AgamOBP7           | AgamOBP7                          | AgamOBP7                       | AgamOBP7                        |                                    |
| 8  | AY146744                            | AGAP000279                  | AgamOBP8           | AgamOBP8                          | AgamOBP8                       | AgamOBP8                        |                                    |
| 9  | AY146740                            | AGAP000278                  | AgamOBP9           | AgamOBP9                          | AgamOBP9                       | AgamOBP9                        |                                    |
| 10 | AY146741                            | AGAP001189#                 | AgamOBP10          | AgamOBP10                         | AgamOBP10                      | AgamOBP10                       |                                    |
| 11 | AY146743                            | AGAP002025                  | AgamOBP11          | AgamOBP11                         | AgamOBP11                      | AgamOBP11                       |                                    |
| 12 | AY146716                            | AGAP002188                  | AgamOBP12          | AgamOBP12                         | AgamOBP12                      | AgamOBP12                       |                                    |
| 13 | AY146718                            | AGAP002905                  | AgamOBP14          | AgamOBP13                         | AgamOBP13                      | AgamOBP13                       | Gene name difference in vectorbase |
| 14 | AY146717                            | AGAP002189                  | AgamOBP13          | AgamOBP14                         | AgamOBP14                      | AgamOBP14                       | Gene name difference in vectorbase |
| 15 | AY146720                            | AGAP003307                  | AgamOBP15          | AgamOBP15                         | AgamOBP15                      | AgamOBP15                       |                                    |
| 16 | AY146722                            | Not available               | Not available      | AgamOBP16                         | AgamOBP16                      |                                 | Not included in this study         |
| 17 | AY146723                            | Not available               | Not available      | AgamOBP17                         | AgamOBP17                      |                                 | Not included in this study         |
| 18 | AY146724                            | Not available               | Not available      | AgamOBP18                         | AgamOBP18                      |                                 | Not included in this study         |
| 19 | AY146726                            | AGAP004433                  | AgamOBP19          | AgamOBP19                         | AgamOBP19                      | AgamOBP19                       |                                    |
| 20 | AY146727                            | AGAP005208                  | AgamOBP20          | AgamOBP20                         | AgamOBP20                      | AgamOBP20                       |                                    |
| 21 | AY146728                            | AGAP008398                  | AgamOBP21          | AgamOBP21                         | AgamOBP21                      | AgamOBP21                       |                                    |
| 22 | AY146730                            | AGAP010409                  | AgamOBP22          | AgamOBP22                         | AgamOBP22                      | AgamOBP22                       |                                    |
| 23 | AY146733                            | AGAP012318                  | AgamOBP23          | AgamOBP23                         | AgamOBP23                      | AgamOBP23                       |                                    |
| 24 | AY146734                            | AGAP012319                  | AgamOBP18          | AgamOBP24                         | AgamOBP24                      | AgamOBP24                       | Gene name difference in vectorbase |
| 25 | AY146735                            | AGAP012320                  | AgamOBP25          | AgamOBP25                         | AgamOBP25                      | AgamOBP25                       |                                    |
| 26 | AY146736                            | AGAP012321                  | AgamOBP26          | AgamOBP26                         | AgamOBP26                      | AgamOBP26                       |                                    |
| 27 | AY146737                            | AGAP012323                  | AgamOBP27          | AgamOBP27                         | AgamOBP27                      | AgamOBP27                       |                                    |
| 28 | AY146738                            | AGAP012325                  | AgamOBP28          | AgamOBP28                         | AgamOBP28                      | AgamOBP28                       |                                    |
| 29 | AY146739                            | AGAP012331                  | No name            | AgamOBP29                         | AgamOBP29                      | AgamOBP29                       |                                    |

# Vectorbase IDs specifically reported in Vieira & Rozas (2011).

† Newly identified OBP genes in Vieira & Rozas (2011) not included in this study.

| n° | Gene identifier in Xu et al. (2003) | Corresponding vectorbase ID | Name in vectorbase | Name as defined in Xu et al. 2003 | Name in (Vieira & Rozas. 2011) | Name in (Manoharan et al. 2012) | Comment                                                                          |
|----|-------------------------------------|-----------------------------|--------------------|-----------------------------------|--------------------------------|---------------------------------|----------------------------------------------------------------------------------|
| 30 | AY146758                            | AGAP011647                  | No name            | AgamOBP30                         | AgamOBP30                      | AgamOBP30                       |                                                                                  |
| 31 | AY146760                            | AGAP010649                  | No name            | AgamOBP31                         | AgamOBP31                      | AgamOBP31                       |                                                                                  |
| 32 | AY146755                            | AGAP000638                  | AgamOBP32          | AgamOBP32                         | AgamOBP32                      | AgamOBP32                       |                                                                                  |
| 33 | AY146754                            | AGAP000640                  | AgamOBP33          | AgamOBP33                         | AgamOBP33                      | AgamOBP33                       |                                                                                  |
| 34 | AY146753                            | AGAP000641                  | AgamOBP34          | AgamOBP34                         | AgamOBP34                      | AgamOBP34                       |                                                                                  |
| 35 | AY146752                            | AGAP000642                  | AgamOBP35          | AgamOBP35                         | AgamOBP35                      | AgamOBP35                       |                                                                                  |
| 36 | AY146751                            | AGAP000643                  | AgamOBP36          | AgamOBP36                         | AgamOBP36                      | AgamOBP36                       |                                                                                  |
| 37 | AY146750                            | AGAP000644                  | No name            | AgamOBP37                         | AgamOBP37                      | AgamOBP37                       |                                                                                  |
| 38 | AY146749                            | AGAP000580                  | AgamOBP38          | AgamOBP38                         | AgamOBP38                      | AgamOBP38                       |                                                                                  |
| 39 | AY146757                            | AGAP002190                  | AgamOBP39          | AgamOBP39                         | AgamOBP39                      | AgamOBP39                       |                                                                                  |
| 40 | AY146756                            | AGAP002191#                 | AgamOBP40          | AgamOBP40                         | AgamOBP40                      | AgamOBP40                       |                                                                                  |
| 41 | AY146748                            | AGAP005182                  | AgamOBP41          | AgamOBP41                         | AgamOBP41                      | AgamOBP41                       |                                                                                  |
| 42 | AY146747                            | AGAP009065                  | AgamOBP42          | AgamOBP42                         | AgamOBP42                      | AgamOBP42                       |                                                                                  |
| 43 | AY146746                            | AGAP009402                  | AgamOBP43          | AgamOBP43                         | AgamOBP43                      | AgamOBP43                       |                                                                                  |
| 44 | AY146732                            | AGAP010648                  | AgamOBP44          | AgamOBP44                         | AgamOBP44                      | AgamOBP44                       |                                                                                  |
| 45 | AY146759                            | AGAP010650                  | AgamOBP45          | AgamOBP45                         | AgamOBP45                      | AgamOBP45                       |                                                                                  |
| 46 | AY330173                            | AGAP007289                  | AgamOBP46          | AgamOBP46                         | AgamOBP46                      | AgamOBP46                       |                                                                                  |
| 47 | AY330174                            | AGAP007287                  | AgamOBP47          | AgamOBP47                         | AgamOBP47                      | AgamOBP47                       |                                                                                  |
| 48 | AY330175                            | AGAP007286                  | No name            | AgamOBP48                         | AgamOBP48                      | AgamOBP48                       |                                                                                  |
| 49 | AY330176                            | AGAP006075                  | AgamOBP49          | AgamOBP49                         | AgamOBP49                      | AgamOBP49                       |                                                                                  |
| 50 | AY330177                            | AGAP006076                  | AgamOBP50          | AgamOBP50                         | AgamOBP50                      | AgamOBP50                       |                                                                                  |
| 51 | AY330178                            | AGAP006077                  | AgamOBP51          | AgamOBP51                         | AgamOBP51                      | AgamOBP51                       |                                                                                  |
| 52 | AY330172                            | AGAP006078                  | AgamOBP52          | AgamOBP52                         | AgamOBP52                      | AgamOBP52                       |                                                                                  |
| 53 | AY330179                            | AGAP006079                  | AgamOBP53          | AgamOBP53                         | AgamOBP53                      | AgamOBP53                       |                                                                                  |
| 54 | AY330180                            | AGAP006080                  | AgamOBP54          | AgamOBP54                         | AgamOBP54                      | AgamOBP54                       |                                                                                  |
| 55 | AY330181                            | AGAP006081                  | AgamOBP55          | AgamOBP55                         | AgamOBP55                      | AgamOBP55                       |                                                                                  |
| 56 | AY330182                            | AGAP011367                  | AgamOBP56          | AgamOBP56                         | AgamOBP56                      | AgamOBP56                       |                                                                                  |
| 57 | AY330183                            | AGAP011368                  | AgamOBP57          | AgamOBP57                         | AgamOBP57                      | AgamOBP57                       |                                                                                  |
| 58 |                                     | AGAP006074#                 | Not available      | Not available                     | AgamOBP77                      | AgamOBP58                       | Gene name difference in between Vieira & Rozas (2011) and Manoharan et al (2011) |
| 59 |                                     | AGAP006760#                 | Not available      | Not available                     | AgamOBP63                      | AgamOBP59                       |                                                                                  |
| 60 |                                     | AGAP007281#                 | Not available      | Not available                     | AgamOBP64                      | AgamOBP60                       |                                                                                  |
| 61 |                                     | AGAP007282#                 | Not available      | Not available                     | AgamOBP61                      | AgamOBP61                       |                                                                                  |

# Vectorbase IDs specifically reported in Vieira & Rozas (2011).

† Newly identified OBP genes in Vieira & Rozas (2011) not included in this study.

| n° | Gene identifier in Xu et al. (2003) | Corresponding vectorbase ID | Name in vectorbase | Name as defined in Xu et al. 2003 | Name in (Vieira & Rozas. 2011) | Name in (Manoharan et al. 2012) | Comment                                                                                                |
|----|-------------------------------------|-----------------------------|--------------------|-----------------------------------|--------------------------------|---------------------------------|--------------------------------------------------------------------------------------------------------|
| 62 |                                     | AGAP002556#                 | Not available      | Not available                     | AgamOBP60                      | AgamOBP62                       | Gene name difference in between Vieira & Rozas (2011) and Manoharan et al (2011)                       |
| 63 |                                     | AGAP012322#                 | Not available      | Not available                     | AgamOBP58                      | AgamOBP63                       |                                                                                                        |
| 64 |                                     | AGAP012324#                 | Not available      | Not available                     | AgamOBP59                      | AgamOBP64                       |                                                                                                        |
| 65 |                                     | AGAP006759#                 | Not available      | Not available                     | AgamOBP66                      | AgamOBP65                       | Gene name difference in between Vieira & Rozas (2011) and Manoharan et al (2011)                       |
| 66 |                                     | AGAP007283#                 | Not available      | Not available                     | AgamOBP62                      | AgamOBP66                       |                                                                                                        |
| 67 |                                     | AGAP012659#                 | Not available      | Not available                     | AgamOBP67                      | AgamOBP67                       |                                                                                                        |
| 68 |                                     | AGAP012658#                 | Not available      | Not available                     | AgamOBP68                      | AgamOBP68                       |                                                                                                        |
| 69 |                                     | AGAP013182#                 | Not available      | Not available                     | AgamOBP79                      | AgamOBP69†                      | New gene identified by Vieira & Rozas (2011). We suggest a new name following the naming in this study |
| 70 |                                     | AGAP006368#                 | Not available      | Not available                     | AgamOBP80                      | AgamOBP70†                      |                                                                                                        |
| 71 |                                     | AGAP012867#                 | Not available      | Not available                     | AgamOBP82                      | AgamOBP71†                      |                                                                                                        |
| 72 |                                     | AGAP012714#                 | Not available      | Not available                     | AgamOBP83                      | AgamOBP72†                      |                                                                                                        |
| 73 |                                     | Not available               | Not available      | Not available                     | AgamOBP65                      |                                 | No genomic data in VectorBase                                                                          |
| 74 |                                     | AGAP008280#                 | Not available      | Not available                     | AgamOBP69                      |                                 | D7 protein                                                                                             |
| 75 |                                     | AGAP008281#                 | Not available      | Not available                     | AgamOBP70                      |                                 | D7 protein                                                                                             |
| 76 |                                     | AGAP008282#                 | Not available      | Not available                     | AgamOBP71                      |                                 | D7 protein                                                                                             |
| 77 |                                     | AGAP008283#                 | Not available      | Not available                     | AgamOBP72                      |                                 | D7 protein                                                                                             |
| 78 |                                     | AGAP008284#                 | Not available      | Not available                     | AgamOBP73                      |                                 | D7 protein                                                                                             |
| 79 |                                     | AGAP008278#                 | Not available      | Not available                     | AgamOBP74                      |                                 | D7 protein                                                                                             |
| 80 |                                     | AGAP008279#                 | Not available      | Not available                     | AgamOBP75                      |                                 | D7 protein                                                                                             |
| 81 |                                     | AGAP008279#                 | Not available      | Not available                     | AgamOBP76                      |                                 | D7 protein                                                                                             |
| 82 |                                     | AGAP006278#                 | Not available      | Not available                     | AgamOBP78                      |                                 | D7 protein                                                                                             |
| 83 |                                     | Not available               | Not available      | Not available                     | AgamOBP81                      |                                 | No genomic data in VectorBase                                                                          |

# Vectorbase IDs specifically reported in Vieira & Rozas (2011).

† Newly identified OBP genes in Vieira & Rozas (2011) not included in this study.

**Supplementary Table 1c.** Complete list of OBP genes from *Aedes aegypti* reported in this study. Alongside their identification and chromosomal locations, shown are their subfamilies, phylogenetic clusters and orthologues in *Anopheles gambiae* and *Culex quinquefasciatus*. The 47 OBPs newly identified in this study (AaegOBP67-AaegOBP114) are indicated by an (\*). †Two genes AaegOBP42 and AaegOBP63 share 100% sequence identity but are localized on different chromosome segments. We cannot resolve which of these two genes is the true orthologue of AgamOBP48 and CquiOBP106. Two way (1:1) orthologues are indicated by a # sign. OBPs that did not cluster in a phylogenetic group were indicated as ‘*unclassified*’ in the ‘Cluster’ column.

| n° | ID         | Name      | Full length | Super contig | Start   | End     | Sub-family  | cluster   | Ortholog in <i>An. gambiae</i> | Ortholog in <i>Culex</i> |
|----|------------|-----------|-------------|--------------|---------|---------|-------------|-----------|--------------------------------|--------------------------|
| 1  | AAEL009449 | AaegOBP1  | 143         | 1.397        | 1059780 | 1064175 | Classic     | OS-E/OS-F | AgamOBP1                       | CquiOBP1                 |
| 2  | AAEL006176 | AaegOBP2  | 158         | 1.193        | 1418261 | 1435259 | Classic     | Pbprp1    | AgamOBP7                       | CquiOBP7                 |
| 3  | AAEL013018 | AaegOBP3  | 143         | 1.776        | 429862  | 431937  | Classic     | OS-E/OS-F |                                |                          |
| 4  | AAEL000073 | AaegOBP4  | 146         | 1.1          | 4140321 | 4154466 | Classic     | OBP19a    |                                | CquiOBP8                 |
| 5  | AAEL000139 | AaegOBP5  | 269         | 1.2          | 651524  | 652909  | PlusC       | mplus6    | AgamObp59a                     | CquiOBP109               |
| 6  | AAEL000821 | AaegOBP6  | 255         | 1.17         | 3417930 | 3418697 | Two-domains | matype4   |                                |                          |
| 7  | AAEL000833 | AaegOBP7  | 279         | 1.17         | 3935676 | 3936843 | Two-domains | matype4   |                                |                          |
| 8  | AAEL001826 | AaegOBP8  | 133         | 1.43         | 1541221 | 1541846 | Classic     | mclassic5 | AgamOBP21                      | CquiOBP23                |
| 9  | AAEL002596 | AaegOBP9  | 132         | 1.61         | 1448858 | 1449413 | Classic     | mclassic3 | AgamOBP23                      | CquiOBP22                |
| 10 | AAEL007603 | AaegOBP10 | 140         | 1.266        | 1269968 | 1270519 | Classic     | mclassic6 | AgamOBP10                      | CquiOBP24                |
| 11 | AAEL002587 | AaegOBP11 | 137         | 1.61         | 1518773 | 1519546 | Classic     | mclassic3 | AgamOBP25                      | CquiOBP19                |
| 12 | AAEL002617 | AaegOBP12 | 132         | 1.61         | 1525746 | 1526203 | Classic     | mclassic3 | AgamOBP28                      | CquiOBP18                |
| 13 | AAEL002591 | AaegOBP13 | 132         | 1.61         | 1541151 | 1541767 | Classic     | mclassic4 |                                |                          |
| 14 | AAEL002605 | AaegOBP14 | 133         | 1.61         | 1560540 | 1560999 | Classic     | mclassic4 |                                |                          |
| 15 | AAEL002598 | AaegOBP15 | 136         | 1.61         | 1605563 | 1618454 | Classic     | mclassic1 | AgamOBP64                      | CquiOBP15                |
| 16 | AAEL003315 | AaegOBP16 | 269         | 1.83         | 2455477 | 2456452 | Two-domains | matype4   |                                |                          |
| 17 | AAEL004339 | AaegOBP17 | 138         | 1.115        | 975305  | 1055633 | Classic     | mclassic7 |                                | CquiOBP53                |
| 18 | AAEL004342 | AaegOBP18 | 140         | 1.115        | 1056506 | 1057069 | Classic     | mclassic9 | AgamOBP14                      |                          |
| 19 | AAEL004343 | AaegOBP19 | 145         | 1.115        | 1059658 | 1060207 | Classic     | mclassic9 |                                | CquiOBP51                |
| 20 | AAEL005778 | AaegOBP20 | 166         | 1.174        | 827019  | 827663  | Classic     | Pbprp4    | AgamOBP62                      | CquiOBP14                |
| 21 | AAEL005770 | AaegOBP21 | 146         | 1.174        | 1511030 | 1512166 | Classic     | Obp99a    |                                |                          |
| 22 | AAEL005772 | AaegOBP22 | 138         | 1.174        | 1532891 | 1533675 | Classic     | Obp99a    | AgamOBP9                       | CquiOBP43                |
| 23 | AAEL006109 | AaegOBP23 | 242         | 1.189        | 217057  | 217969  | PlusC       | mplus11   |                                |                          |
| 24 | AAEL006108 | AaegOBP24 | 200         | 1.189        | 234195  | 245248  | PlusC       | mplus11   |                                |                          |
| 25 | AAEL006103 | AaegOBP25 | 200         | 1.189        | 2037030 | 2054778 | PlusC       | mplus11   | AgamOBP57                      | CquiOBP104               |
| 26 | AAEL006106 | AaegOBP26 | 352         | 1.189        | 2063847 | 2065664 | PlusC       | mplus11   | AgamOBP56                      | CquiOBP102               |

\*Newly discovered genes in this study.

# Only a two way (1:1) orthology has been established for these genes and not a three way (1:1:1) orthology.

†Two genes AaegOBP42 and AaegOBP63 share 100% sequence identity but are localized on different chromosome segments. We cannot resolve for these two genes which is the true orthologue of AgamOBP48 and CquiOBP106.

| n° | ID         | Name       | Full length | Super contig                                                  | Start   | End     | Sub-family  | cluster   | Ortholog in <i>An. gambiae</i> | Ortholog in <i>Culex</i> |  |
|----|------------|------------|-------------|---------------------------------------------------------------|---------|---------|-------------|-----------|--------------------------------|--------------------------|--|
| 27 | AAEL000071 | AaegOBP27  | 141         | 1.1                                                           | 4056982 | 4057610 | Classic     | OBP19a    | AgamOBP6                       | CquiOBP13                |  |
| 28 | AAEL006393 | AaegOBP28  | 322         | 1.203                                                         | 1485149 | 1497912 | Two-domains | matype3   |                                |                          |  |
| 29 | AAEL006387 | AaegOBP29  | 286         | 1.203                                                         | 1497040 | 1521142 | Two-domains | matype3   | AgamOBP31                      |                          |  |
| 30 |            | AaegOBP30  |             | Previously reported, this gene is not available in VectorBase |         |         |             |           |                                |                          |  |
| 31 | AAEL006396 | AaegOBP31  | 331         | 1.203                                                         | 1526927 | 1527922 | Two-domains | matype3   |                                |                          |  |
| 32 | AAEL006398 | AaegOBP32  | 336         | 1.203                                                         | 1537009 | 1538019 | Two-domains | matype3   |                                | CquiOBP86                |  |
| 33 | AAEL006385 | AaegOBP33  | 313         | 1.203                                                         | 1538561 | 1539571 | Two-domains | matype3   |                                |                          |  |
| 34 | AAEL014082 | AaegOBP34  | 149         | 1.1002                                                        | 187323  | 188351  | Classic     | LUSH      |                                |                          |  |
| 35 | AAEL002606 | AaegOBP35  | 131         | 1.61                                                          | 1497852 | 1498861 | Classic     | mclassic3 | AgamOBP26                      | CquiOBP20                |  |
| 36 | AAEL008011 | AaegOBP36  | 152         | 1.294                                                         | 802739  | 803197  | Classic     | OS-E/OS-F | AgamOBP15                      | CquiOBP5                 |  |
| 37 | AAEL008009 | AaegOBP37  | 148         | 1.294                                                         | 823671  | 828548  | Classic     | OS-E/OS-F |                                | CquiOBP4                 |  |
| 38 | AAEL008013 | AaegOBP38  | 140         | 1.294                                                         | 1185169 | 1186628 | Classic     | OS-E/OS-F | AgamOBP3                       | CquiOBP2                 |  |
| 39 | AAEL006454 | AaegOBP39  | 146         | ig1.206                                                       | 50736   | 67086   | Classic     | LUSH      | AgamOBP4                       | CquiOBP6                 |  |
| 40 | AAEL009597 | AaegOBP40  | 291         | 1.411                                                         | 257365  | 258240  | Two-domains | matype1   | AgamOBP39                      | CquiOBP84                |  |
| 41 | AAEL009599 | AaegOBP41  | 297         | 1.411                                                         | 258377  | 259352  | Two-domains | matype1   |                                | CquiOBP85                |  |
| 42 | AAEL010666 | AaegOBP42† | 157         | 1.495                                                         | 848252  | 848790  | PlusC       | mplus1    | †AgamOBP48                     | †CquiOBP106              |  |
| 43 | AAEL010662 | AaegOBP43  | 193         | 1.495                                                         | 849614  | 850509  | PlusC       | mplus1    |                                |                          |  |
| 44 | AAEL010718 | AaegOBP44  | 219         | 1.500                                                         | 470519  | 471178  | Two-domains | matype4   |                                | CquiOBP78                |  |
| 45 | AAEL010714 | AaegOBP45  | 260         | 1.500                                                         | 485823  | 486827  | Two-domains | matype4   |                                |                          |  |
| 46 | AAEL010872 | AaegOBP46  | 298         | 1.514                                                         | 549927  | 550986  | Two-domains | matype4   |                                |                          |  |
| 47 | AAEL011499 | AaegOBP47  | 191         | 1.584                                                         | 253363  | 254080  | PlusC       | mplus1    |                                |                          |  |
| 48 | AAEL011494 | AaegOBP48  | 214         | 1.584                                                         | 270443  | 271204  | PlusC       | mplus2    | AgamOBP46                      | CquiOBP108               |  |
| 49 | AAEL011484 | AaegOBP49  | 187         | 1.584                                                         | 357678  | 358469  | PlusC       | mplus4    |                                |                          |  |
| 50 | AAEL011490 | AaegOBP50  | 199         | 1.584                                                         | 358749  | 359468  | PlusC       | mplus4    |                                |                          |  |
| 51 | AAEL011487 | AaegOBP51  | 195         | 1.584                                                         | 391587  | 398988  | PlusC       | mplus4    | AgamOBP60                      |                          |  |
| 52 | AAEL011491 | AaegOBP52  | 184         | 1.584                                                         | 422989  | 423783  | PlusC       | mplus4    |                                |                          |  |
| 53 | AAEL011482 | AaegOBP53  | 182         | 1.584                                                         | 423953  | 424743  | PlusC       | mplus4    |                                | CquiOBP110               |  |
| 54 | AAEL011481 | AaegOBP54  | 181         | 1.584                                                         | 434945  | 435608  | PlusC       | mplus4    |                                |                          |  |
| 55 | AAEL012377 | AaegOBP55  | 151         | 1.685                                                         | 122245  | 142217  | Classic     | OBP19a    | AgamOBP20                      | CquiOBP11                |  |
| 56 | AAEL000051 | AaegOBP56  | 115         | 1.1                                                           | 4124658 | 4140143 | Classic     | OBP19a    | AgamOBP19                      | CquiOBP12                |  |

\*Newly discovered genes in this study.

# Only a two way (1:1) orthology has been established for these genes and not a three way (1:1:1) orthology.

†Two genes *AaegOBP42* and *AaegOBP63* share 100% sequence identity but are localized on different chromosome segments. We cannot resolve for these two genes which is the true orthologue of *AgamOBP48* and *CquiOBP106*.

| n° | ID         | Name       | Full length | Super contig                                                  | Start   | End     | Sub-family  | cluster             | Ortholog in <i>An. gambiae</i> | Ortholog in <i>Culex</i> |  |
|----|------------|------------|-------------|---------------------------------------------------------------|---------|---------|-------------|---------------------|--------------------------------|--------------------------|--|
| 57 | AAEL000035 | AaegOBP57  | 151         | 1.1                                                           | 3668288 | 3668784 | Classic     | Pbprp2/5            | AgamOBP13                      | CquiOBP28                |  |
| 58 | AAEL014430 | AaegObp58  | 285         | 1.1115                                                        | 141516  | 149446  | Two-domains | <i>unclassified</i> |                                |                          |  |
| 59 | AAEL015313 | AaegOBP59  | 166         | 1.1784                                                        | 37928   | 38729   | Classic     | Pbprp4              |                                |                          |  |
| 60 | AAEL015499 | AaegOBP60  | 150         | 1.2733                                                        | 6977    | 7459    | Classic     | OS-E/OS-F           | AgamOBP2                       | CquiOBP3                 |  |
| 61 | AAEL015554 | AaegOBP61  | 132         | 1.3221                                                        | 5993    | 6448    | Classic     | mclassic4           | AgamOBP63                      | CquiOBP17                |  |
| 62 | AAEL015566 | AaegOBP62  | 193         | 1.3337                                                        | 1317    | 2221    | PlusC       | mplus1              |                                |                          |  |
| 63 | AAEL015567 | AaegOBP63† | 157         | 1.3337                                                        | 2936    | 3570    | PlusC       | mplus1              | †AgamOBP48                     | †CquiOBP106              |  |
| 64 |            | AaegOBP64  |             | Previously reported, this gene is not available in VectorBase |         |         |             |                     |                                |                          |  |
| 65 | AAEL002618 | AaegOBP65  | 98          | 1.61                                                          | 1577860 | 1578251 | Classic     | mclassic1           | AgamOBP27                      | CquiOBP16                |  |
| 66 |            | AaegOBP66  |             | Previously reported but same gene as AaegOBP35                |         |         |             |                     |                                |                          |  |
| 67 | AAEL011497 | AaegOBP67* | 158         | 1.584                                                         | 380693  | 381721  | PlusC       | mplus4              |                                |                          |  |
| 68 | AAEL011489 | AaegOBP68* | 189         | 1.584                                                         | 360426  | 380332  | PlusC       | mplus4              |                                |                          |  |
| 69 | AAEL000124 | AaegOBP69* | 180         | 1.2                                                           | 673060  | 674073  | PlusC       | mplus7              | AgamOBP54                      |                          |  |
| 70 | AAEL006105 | AaegOBP70* | 227         | 1.189                                                         | 2070866 | 2071667 | PlusC       | mplus11             |                                | CquiOBP103               |  |
| 71 | AAEL006094 | AaegOBP71* | 227         | 1.189                                                         | 205937  | 206741  | PlusC       | mplus11             |                                |                          |  |
| 72 | AAEL004729 | AaegOBP72* | 178         | 1.128                                                         | 259634  | 260619  | PlusC       | mplus8              |                                | CquiOBP111               |  |
| 73 | AAEL004730 | AaegOBP73* | 168         | 1.128                                                         | 267328  | 268254  | PlusC       | mplus8              | AgamOBP49                      | CquiOBP112               |  |
| 74 | AAEL011486 | AaegOBP74* | 193         | 1.584                                                         | 304385  | 305157  | PlusC       | mplus5              |                                |                          |  |
| 75 | AAEL011483 | AaegOBP75* | 193         | 1.584                                                         | 321689  | 322507  | PlusC       | mplus5              |                                | CquiOBP107               |  |
| 76 | AAEL007604 | AaegOBP76* | 134         | 1.266                                                         | 1288889 | 1290609 | Classic     | mclassic6           |                                |                          |  |
| 77 | AAEL002626 | AaegOBP77* | 138         | 1.61                                                          | 1455363 | 1456069 | Classic     | mclassic2           | AgamOBP24                      | CquiOBP21                |  |
| 78 | AAEL001836 | AaegOBP78* | 135         | 1.43                                                          | 1535067 | 1535644 | Classic     | minus C             |                                | CquiOBP70                |  |
| 79 | AAEL007014 | AaegOBP79* | 154         | 1.132                                                         | 2272455 | 2273324 | Classic     | <i>unclassified</i> |                                |                          |  |
| 80 | AAEL007003 | AaegOBP80* | 152         | 1.231                                                         | 1719941 | 1720462 | Classic     | <i>unclassified</i> |                                |                          |  |
| 81 | AAEL011730 | AaegOBP81* | 151         | 1.606                                                         | 650035  | 650560  | Classic     | mclassic8           | AgamOBP22                      | CquiOBP44                |  |
| 82 | AAEL014593 | AaegOBP82* | 145         | 1.1181                                                        | 11402   | 11955   | PlusC       | mplus3              |                                | CquiOBP101               |  |
| 83 | AAEL011416 | AaegOBP83* | 304         | 1.579                                                         | 450825  | 451739  | Classic     | Obp59a              | AgamOBP29                      | CquiOBP55                |  |
| 84 | AAEL000827 | AaegOBP84* | 287         | 1.17                                                          | 3989260 | 3990220 | Two-domains | matype4             |                                |                          |  |
| 85 | AAEL000831 | AaegOBP85* | 253         | 1.17                                                          | 3976929 | 3977690 | Two-domains | matype4             |                                |                          |  |
| 86 | AAEL004856 | AaegOBP86* | 255         | 1.132                                                         | 2272456 | 2273324 | Two-domains | matype4             |                                |                          |  |
| 87 | AAEL003511 | AaegOBP87* | 265         | 1.89                                                          | 1577417 | 1578335 | Two-domains | matype4             |                                | CquiOBP76                |  |

\*Newly discovered genes in this study.

# Only a two way (1:1) orthology has been established for these genes and not a three way (1:1:1) orthology.

†Two genes AaegOBP42 and AaegOBP63 share 100% sequence identity but are localized on different chromosome segments. We cannot resolve for these two genes which is the true orthologue of AgamOBP48 and CquiOBP106.

| n°  | ID         | Name         | Full length | Super contig | Start   | End     | Sub-family  | cluster             | Ortholog in <i>An. gambiae</i> | Ortholog in <i>Culex</i> |
|-----|------------|--------------|-------------|--------------|---------|---------|-------------|---------------------|--------------------------------|--------------------------|
| 88  | AAEL010874 | AaegOBP88*   | 299         | 1.514        | 517957  | 519061  | Two-domains | matype4             |                                |                          |
| 89  | AAEL000377 | AaegOBP89*   | 315         | 1.6          | 3059016 | 3060090 | Two-domains | matype2             |                                |                          |
| 90  | AAEL013719 | AaegOBP90*   | 202         | 1.902        | 36629   | 37757   | Two-domains | matype2             |                                |                          |
| 91  | AAEL013720 | AaegOBP91*   | 273         | 1.902        | 26444   | 29202   | Two-domains | matype2             |                                | CquiOBP87                |
| 92  | AAEL000318 | AaegOBP92*   | 294         | 1.6          | 3110479 | 3111363 | Two-domains | matype2             |                                |                          |
| 93  | AAEL000319 | AaegOBP93*   | 287         | 1.6          | 3087173 | 3088138 | Two-domains | matype2             |                                |                          |
| 94  | AAEL000344 | AaegOBP94*   | 312         | 1.6          | 3052765 | 3053725 | Two-domains | matype2             |                                |                          |
| 95  | AAEL000350 | AaegOBP95*   | 294         | 1.6          | 3114188 | 3116137 | Two-domains | matype2             |                                |                          |
| 96  | AAEL000796 | AaegOBP96*   | 305         | 1.17         | 3920770 | 3922193 | Two-domains | matype4             |                                |                          |
| 97  | AAEL000835 | AaegOBP97*   | 260         | 1.17         | 3900849 | 3901700 | Two-domains | matype4             |                                |                          |
| 98  | AAEL001174 | AaegOBP98*   | 586         | 1.24         | 2847433 | 2850832 | Two-domains | matype2             |                                | CquiOBP95                |
| 99  | AAEL001179 | AaegOBP99*   | 332         | 1.24         | 2705024 | 2711778 | Two-domains | matype2             |                                |                          |
| 100 | AAEL003513 | AaegOBP100*  | 278         | 1.89         | 1529116 | 1529952 | Two-domains | matype4             |                                | CquiOBP77                |
| 101 | AAEL003525 | AaegOBP101*  | 370         | 1.89         | 1489315 | 1498788 | Two-domains | matype4             |                                |                          |
| 102 | AAEL003538 | AaegOBP102*  | 291         | 1.89         | 1554285 | 1555425 | Two-domains | matype4             | AgamOBP32                      |                          |
| 103 | AAEL010875 | AaegOBP103*  | 299         | 1.514        | 538264  | 539163  | Two-domains | matype4             |                                |                          |
| 104 | AAEL004516 | AaegOBP104*  | 295         | 1.122        | 2397633 | 2398520 | Two-domains | matype2             |                                |                          |
| 105 | AAEL001189 | AaegOBP105*  | 309         | 1.24         | 2833159 | 2834187 | Two-domains | matype2             |                                |                          |
| 106 | AAEL001153 | AaegOBP106*# | 302         | 1.24         | 2825960 | 2826974 | Two-domains | matype2             | AgamOBP34/<br>37#              | CquiOBP97#               |
| 107 | AAEL014876 | AaegOBP107*  | 299         | 1.1319       | 90885   | 91826   | Atypical    | matype2             |                                | CquiOBP94                |
| 108 | AAEL014874 | AaegOBP108*  | 278         | 1.1319       | 77202   | 78116   | Two-domains | matype2             |                                |                          |
| 109 | AAEL009433 | AaegOBP109*  | 278         | 1.396        | 502699  | 503646  | Two-domains | matype2             |                                |                          |
| 110 | AAEL014431 | AaegOBP110*  | 268         | 1.1115       | 149798  | 150604  | Two-domains | <i>unclassified</i> |                                |                          |
| 111 | AAEL003311 | AaegOBP111*  | 347         | 1.83         | 658245  | 668798  | Two-domains | matype4             |                                |                          |

\*Newly discovered genes in this study.

# Only a two way (1:1) orthology has been established for these genes and not a three way (1:1:1) orthology.

†Two genes *AaegOBP42* and *AaegOBP63* share 100% sequence identity but are localized on different chromosome segments. We cannot resolve for these two genes which is the true orthologue of *AgamOBP48* and *CquiOBP106*.

| n°  | ID         | Name        | Full length | Super contig | Start   | End     | Sub-family  | cluster             | Ortholog in <i>An. gambiae</i> | Ortholog in <i>Culex</i> |
|-----|------------|-------------|-------------|--------------|---------|---------|-------------|---------------------|--------------------------------|--------------------------|
| 112 | AAEL000837 | AaegOBP112* | 306         | 1.17         | 3960390 | 3961459 | Two-domains | matype4             |                                |                          |
| 113 | AAEL008640 | AaegOBP113* | 274         | 1.338        | 484248  | 485189  | Two-domains | <i>unclassified</i> |                                |                          |
| 114 | AAEL001487 | AaegOBP114* | 305         | 1.34         | 1695923 | 1698069 | Two-domains | <i>unclassified</i> |                                |                          |

\*Newly discovered genes in this study.

# Only a two way (1:1) orthology has been established for these genes and not a three way (1:1:1) orthology.

†Two genes *AaegOBP42* and *AaegOBP63* share 100% sequence identity but are localized on different chromosome segments. We cannot resolve for these two genes which is the true orthologue of *AgamOBP48* and *CquiOBP106*.

**Supplementary Table 1d. OBP gene names for *Culex quinquefasciatus* PlusC OBPs.** Shown is the correspondence between the OBP gene names used in this study and the names used in (Pelletier and Leal, 2011).

| n° | Gene identifier in Pelletier and Leal (2011) | Corresponding vectorbase ID | Name in(Pelletier and Leal, 2011) | Name used in this study                                 |
|----|----------------------------------------------|-----------------------------|-----------------------------------|---------------------------------------------------------|
| 1  | HQ845073                                     | CPIJ002105                  | CquiOBP+C1                        | CquiOBP106                                              |
| 2  | HQ845074                                     | CPIJ002106                  | CquiOBP+C2                        | CquiOBP105                                              |
| 3  | EDS32239                                     | CPIJ002108                  | CquiOBP+C3                        | CquiOBP108                                              |
| 4  | EDS32240                                     | CPIJ002109                  | CquiOBP+C4                        | CquiOBP107                                              |
| 5  | EDS32241                                     | CPIJ002110                  | CquiOBP+C5                        | <b>New gene identified by Pelletier and Leal (2011)</b> |
| 6  | EDS32242                                     | CPIJ002111                  | CquiOBP+C6                        | CquiOBP110                                              |
| 7  | EDS42861                                     | CPIJ004630                  | CquiOBP+C7                        | CquiOBP104                                              |
| 8  | EDS42865                                     | CPIJ004634                  | CquiOBP+C8                        | CquiOBP102                                              |
| 9  | EDS42866                                     | CPIJ004635                  | CquiOBP+C9                        | CquiOBP103                                              |
| 10 | EDS32591                                     | CPIJ008867                  | CquiOBP+C10                       | CquiOBP111                                              |
| 11 | EDS32592                                     | CPIJ008868                  | CquiOBP+C11                       | CquiOBP112                                              |
| 12 | EDS28215                                     | CPIJ006608                  | CquiOBP+C12                       | CquiOBP109                                              |
| 13 | EDS32360                                     | CPIJ008979                  | CquiOBP+C13                       | CquiOBP101                                              |

**Supplementary Table 1e.** Complete list of OBP genes from *Culex quinquefasciatus* Reported in this study. Alongside their identification and chromosomal locations, shown are their subfamilies, phylogenetic clusters and orthologues in *Anopheles gambiae* and *Aedes aegypti*. †The last two genes were identified by Vieira & Rozas (2011) and were added to this Table at the last moment after renaming them CquiOBP113 and CquiOBP114. Two way (1:1) orthologues are indicated by a # sign. OBPs that did not clustered in a phylogenetic group were indicated as ‘unclassified’ in the ‘Cluster’ column.

| n° | ID         | Name      | Full length | Super contig | Start   | End     | Sub-family | Cluster   | Ortholog in <i>An. gambiae</i> | Ortholog in <i>Ae. aegyptii</i> |
|----|------------|-----------|-------------|--------------|---------|---------|------------|-----------|--------------------------------|---------------------------------|
| 1  | CPIJ007604 | CquiOBP1  | 149         | 3.150        | 170719  | 174721  | Classic    | OS-E/OS-F | AgamOBP1                       | AaegOBP1                        |
| 2  | CPIJ007617 | CquiOBP2  | 146         | 3.150        | 672931  | 673546  | Classic    | OS-E/OS-F | AgamOBP3                       | AaegOBP38                       |
| 3  | CPIJ007611 | CquiOBP3  | 147         | 3.150        | 540281  | 542064  | Classic    | OS-E/OS-F | AgamOBP2                       | AaegOBP60                       |
| 4  | CPIJ001730 | CquiOBP4  | 150         | 3.25         | 734060  | 734572  | Classic    | OS-E/OS-F |                                | AaegOBP37                       |
| 5  | CPIJ007608 | CquiOBP5  | 143         | 3.150        | 516885  | 517412  | Classic    | OS-E/OS-F | AgamOBP15                      | AaegOBP36                       |
| 6  | CPIJ008793 | CquiOBP6  | 89          | 3.206        | 489697  | 490937  | Classic    | LUSH      | AgamOBP4                       | AaegOBP39                       |
| 7  | CPIJ001365 | CquiOBP7  | 136         | 3.18         | 1720262 | 1721216 | Classic    | Pbprp1    | AgamOBP7                       | AaegOBP2                        |
| 8  | CPIJ009568 | CquiOBP8  | 144         | 3.240        | 122626  | 123234  | Classic    | OBP19a    |                                | AaegOBP4                        |
| 9  | CPIJ016948 | CquiOBP9  | 139         | 3.865        | 41129   | 46297   | Classic    | OBP19a    |                                |                                 |
| 10 | CPIJ013976 | CquiOBP10 | 132         | 3.550        | 256165  | 256681  | Classic    | OBP19a    |                                |                                 |
| 11 | CPIJ006551 | CquiOBP11 | 144         | 3.121        | 270272  | 277928  | Classic    | OBP19a    | AgamOBP20                      | AaegOBP55                       |
| 12 | CPIJ016949 | CquiOBP12 | 121         | 3.865        | 46518   | 47165   | Classic    | OBP19a    | AgamOBP19                      | AaegOBP56                       |
| 13 | CPIJ016952 | CquiOBP13 | 143         | 3.865        | 54944   | 61815   | Classic    | OBP19a    | AgamOBP6                       | AaegOBP27                       |
| 14 | CPIJ009586 | CquiOBP14 | 170         | 3.240        | 569948  | 574407  | Classic    | Pbprp4    | AgamOBP62                      | AaegOBP20                       |
| 15 | CPIJ012714 | CquiOBP15 | 141         | 3.424        | 103588  | 109982  | Classic    | mclassic1 | AgamOBP64                      | AaegOBP15                       |
| 16 | CPIJ012715 | CquiOBP16 | 134         | 3.424        | 112183  | 112979  | Classic    | mclassic1 | AgamOBP27                      | AaegOBP65                       |
| 17 | CPIJ012716 | CquiOBP17 | 132         | 3.424        | 113896  | 114578  | Classic    | mclassic4 | AgamOBP63                      | AaegOBP61                       |
| 18 | CPIJ012717 | CquiOBP18 | 132         | 3.424        | 122946  | 123411  | Classic    | mclassic3 | AgamOBP28                      | AaegOBP12                       |
| 19 | CPIJ012718 | CquiOBP19 | 139         | 3.424        | 131078  | 131864  | Classic    | mclassic3 | AgamOBP25                      | AaegOBP11                       |
| 20 | CPIJ012719 | CquiOBP20 | 131         | 3.424        | 135879  | 136509  | Classic    | mclassic3 | AgamOBP26                      | AaegOBP35                       |
| 21 | CPIJ012720 | CquiOBP21 | 139         | 3.424        | 171439  | 171968  | Classic    | mclassic2 | AgamOBP24                      | AaegOBP77                       |
| 22 | CPIJ012721 | CquiOBP22 | 131         | 3.424        | 172603  | 173060  | Classic    | mclassic3 | AgamOBP23                      | AaegOBP9                        |
| 23 | CPIJ001876 | CquiOBP23 | 136         | 3.26         | 255589  | 259525  | Classic    | mclassic5 | AgamOBP21                      | AaegOBP8                        |
| 24 | CPIJ014525 | CquiOBP24 | 137         | 3.561        | 24869   | 25524   | Classic    | mclassic6 | AgamOBP10                      | AaegOBP10                       |
| 25 | CPIJ010723 | CquiOBP25 | 121         | 3.286        | 224289  | 224718  | Classic    | Pbprp2/5  |                                |                                 |
| 26 | CPIJ010724 | CquiOBP26 | 119         | 3.286        | 228005  | 228420  | Classic    | Pbprp2/5  |                                |                                 |
| 27 | CPIJ010728 | CquiOBP27 | 126         | 3.286        | 489935  | 490384  | Classic    | Pbprp2/5  |                                |                                 |
| 28 | CPIJ016965 | CquiOBP28 | 150         | 3.865        | 148161  | 148975  | Classic    | Pbprp2/5  | AgamOBP13                      | AaegOBP57                       |
| 29 | CPIJ016966 | CquiOBP29 | 130         | 3.865        | 149508  | 150489  | Classic    | Pbprp2/5  |                                |                                 |

\*Newly discovered genes in this study.

# Only a two way (1:1) orthology has been established for these genes and not a three way (1:1:1) orthology.

nd : not determined

† New genes recently reported by Vieira & Rozas (2011)

| n° | ID         | Name       | Full length | Super contig | Start                                                   | End    | Sub-family | Cluster   | Ortholog in <i>An. gambiae</i> | Ortholog in <i>Ae. aegyptii</i> |  |  |
|----|------------|------------|-------------|--------------|---------------------------------------------------------|--------|------------|-----------|--------------------------------|---------------------------------|--|--|
| 30 | CPIJ016967 | CquiOBP30  | 143         | 3.865        | 154625                                                  | 155111 | Classic    | Pbprp2/5  |                                |                                 |  |  |
| 31 | CPIJ008285 | CquiOBP31  | 124         | 3.167        | 404302                                                  | 404732 | Classic    | Pbprp2/5  |                                |                                 |  |  |
| 32 | CPIJ016479 | CquiOBP32  | 126         | 3.770        | 2731                                                    | 3167   | Classic    | Pbprp2/5  |                                |                                 |  |  |
| 33 | CPIJ019607 | CquiOBP33  | 124         | 3.1894       | 15149                                                   | 15587  | Classic    | Pbprp2/5  |                                |                                 |  |  |
| 34 | CPIJ019608 | CquiOBP34  | 116         | 3.1894       | 29115                                                   | 29465  | Classic    | Pbprp2/5  |                                |                                 |  |  |
| 35 | CPIJ019609 | CquiOBP35  | 126         | 3.1894       | 31188                                                   | 31622  | Classic    | Pbprp2/5  |                                |                                 |  |  |
| 36 | CPIJ019610 | CquiOBP36  | 146         | 3.1894       | 41408                                                   | 41883  | Classic    | Pbprp2/5  |                                |                                 |  |  |
| 37 | CPIJ007931 | CquiOBP37  | 135         | 3.181        | 460064                                                  | 466993 | Classic    | Pbprp2/5  |                                |                                 |  |  |
| 38 | CPIJ007932 | CquiOBP38  | 137         | 3.181        | 467058                                                  | 467528 | Classic    | Pbprp2/5  |                                |                                 |  |  |
| 39 | CPIJ007933 | CquiOBP39  | 126         | 3.181        | 481658                                                  | 482092 | Classic    | Pbprp2/5  |                                |                                 |  |  |
| 40 | CPIJ007934 | CquiOBP40  | 107         | 3.181        | 487383                                                  | 487920 | Classic    | Pbprp2/5  |                                |                                 |  |  |
| 41 | CPIJ007935 | CquiOBP41  | 98          | 3.181        | 488157                                                  | 488453 | Classic    | Pbprp2/5  |                                |                                 |  |  |
| 42 | CPIJ007936 | CquiOBP42  | 111         | 3.181        | 492753                                                  | 493384 | Classic    | Pbprp2/5  |                                |                                 |  |  |
| 43 | CPIJ017326 | CquiOBP43  | 138         | 3.984        | 153967                                                  | 154634 | Classic    | Obp99a    | AgamOBP9                       | AaegOBP22                       |  |  |
| 44 | CPIJ009937 | CquiOBP44  | 147         | 3.265        | 418539                                                  | 421106 | Classic    | mclassic8 | AgamOBP22                      | AaegOBP81                       |  |  |
| 45 |            | CquiOBP45  |             |              | Reported in previous paper, not available in VectorBase |        |            |           |                                |                                 |  |  |
| 46 | CPIJ010782 | CquiOBP46  | 150         | 3.315        | 176953                                                  | 177463 | Classic    | mclassic9 |                                |                                 |  |  |
| 47 |            | CquiOBP47  |             |              | Reported in previous paper, not available in VectorBase |        |            |           |                                |                                 |  |  |
| 48 |            | CquiOBP48  |             |              | Reported in previous paper, not available in VectorBase |        |            |           |                                |                                 |  |  |
| 49 |            | CquiOBP49  |             |              | Reported in previous paper, not available in VectorBase |        |            |           |                                |                                 |  |  |
| 50 |            | CquiOBP50  |             |              | Reported in previous paper, not available in VectorBase |        |            |           |                                |                                 |  |  |
| 51 | CPIJ010787 | CquiOBP51  | 144         | 3.315        | 189941                                                  | 190471 | Classic    | mclassic9 |                                | AaegOBP19                       |  |  |
| 52 | CPIJ010788 | CquiOBP52  | 143         | 3.315        | 190549                                                  | 191091 | Classic    | mclassic9 |                                |                                 |  |  |
| 53 | CPIJ010789 | CquiOBP53  | 145         | 3.315        | 191345                                                  | 193026 | Classic    | mclassic7 |                                | AaegOBP17                       |  |  |
| 54 | CPIJ007937 | CquiOBP54* | 170         | 3.181        | 496322                                                  | 497393 | Classic    | Pbprp2/5  |                                |                                 |  |  |
| 55 | CPIJ010367 | CquiOBP55* | 235         | 3.273        | 146471                                                  | 147364 | Classic    | Obp59a    | AgamOBP29                      | AaegOBP83                       |  |  |
| 56 | CPIJ010729 | CquiOBP56* | 214         | 3.286        | 493370                                                  | 501823 | Classic    | Pbprp2/5  |                                |                                 |  |  |
| 57 | CPIJ016951 | CquiOBP57* | 126         | 3.865        | 50440                                                   | 50879  | Classic    | OBP19a    |                                |                                 |  |  |
| 58 | CPIJ007609 | CquiObp58* | 141         | 3.150        | 526150                                                  | 526551 | Classic    | OS-E/OS-F |                                |                                 |  |  |
| 59 | CPIJ001871 | CquiOBP59* | 113         | 3.26         | 242975                                                  | 243783 | Classic    | minus C   |                                |                                 |  |  |
| 60 | CPIJ012786 | CquiOBP60* | 138         | 3.443        | 357791                                                  | 358353 | Classic    | minus C   |                                |                                 |  |  |
| 61 | CPIJ015943 | CquiOBP61* | 138         | 3.727        | 98658                                                   | 99154  | Classic    | minus C   |                                |                                 |  |  |
| 62 | CPIJ015944 | CquiOBP62* | 120         | 3.727        | 99851                                                   | 104141 | Classic    | minus C   |                                |                                 |  |  |
| 63 | CPIJ016343 | CquiOBP63* | 181         | 3.758        | 25841                                                   | 28252  | Classic    | mclassic9 | AgamOBP14                      |                                 |  |  |

\*Newly discovered genes in this study.

# Only a two way (1:1) orthology has been established for these genes and not a three way (1:1:1) orthology.

nd : not determined

† New genes recently reported by Vieira & Rozas (2011)

| n° | ID         | Name        | Full length | Super contig | Start   | End     | Sub-family  | Cluster | Ortholog in <i>An. gambiae</i> | Ortholog in <i>Ae. aegyptii</i> |
|----|------------|-------------|-------------|--------------|---------|---------|-------------|---------|--------------------------------|---------------------------------|
| 64 | CPIJ004145 | CquiOBP64*  | 206         | 3.64         | 238526  | 238997  | Classic     | minus C |                                |                                 |
| 65 | CPIJ001875 | CquiOBP65*  | 136         | 3.26         | 253862  | 254332  | Classic     | minus C |                                |                                 |
| 66 | CPIJ001865 | CquiOBP66*  | 136         | 3.26         | 220863  | 221383  | Classic     | minus C |                                |                                 |
| 67 | CPIJ017432 | CquiOBP67*  | 130         | 3.930        | 38452   | 43014   | Classic     | minus C |                                |                                 |
| 68 | CPIJ001873 | CquiOBP68*  | 119         | 3.26         | 248382  | 249594  | Classic     | minus C |                                |                                 |
| 69 | CPIJ001874 | CquiOBP69*  | 137         | 3.26         | 249635  | 250213  | Classic     | minus C |                                |                                 |
| 70 | CPIJ001872 | CquiOBP70*  | 122         | 3.26         | 247521  | 248064  | Classic     | minus C |                                | AaegOBP78                       |
| 71 | CPIJ001870 | CquiOBP71*  | 136         | 3.26         | 234093  | 234614  | Classic     | minus C |                                |                                 |
| 72 | CPIJ001867 | CquiOBP72*  | 134         | 3.26         | 226275  | 226723  | Classic     | minus C |                                |                                 |
| 73 | CPIJ001869 | CquiOBP73*  | 98          | 3.26         | 232747  | 233357  | Classic     | minus C |                                |                                 |
| 74 | CPIJ001868 | CquiOBP74*  | 132         | 3.26         | 226902  | 227400  | Classic     | minus C |                                |                                 |
| 75 | CPIJ008157 | CquiOBP75*  | 128         | 3.183        | 230895  | 231773  | Two-domains | matype4 |                                |                                 |
| 76 | CPIJ008158 | CquiOBP76#* | 292         | 3.183        | 231998  | 233839  | Two-domains | matype4 | AgamOBP43#                     | AaegOBP87#                      |
| 77 | CPIJ008159 | CquiOBP77*  | 521         | 3.183        | 234041  | 234919  | Two-domains | matype4 |                                | AaegOBP100                      |
| 78 | CPIJ008155 | CquiOBP78*  | 292         | 3.183        | 226602  | 227315  | Two-domains | matype4 |                                | AaegOBP44                       |
| 79 | CPIJ008156 | CquiOBP79*  | 237         | 3.183        | 227485  | 230705  | Two-domains | matype4 |                                |                                 |
| 80 | CPIJ008160 | CquiOBP80*  | 250         | 3.183        | 235156  | 236019  | Two-domains | matype4 |                                |                                 |
| 81 | CPIJ008161 | CquiOBP81*  | 287         | 3.183        | 237704  | 238659  | Two-domains | matype4 |                                |                                 |
| 82 | CPIJ008154 | CquiOBP82*  | 309         | 3.183        | 225309  | 225992  | Two-domains | matype4 |                                |                                 |
| 83 | CPIJ000653 | CquiOBP83*  | 227         | 3.7          | 1883021 | 1884070 | Two-domains | matype4 |                                |                                 |
| 84 | CPIJ015732 | CquiOBP84*  | 349         | 3.670        | 26079   | 26960   | Two-domains | matype1 | AgamOBP39                      | AaegOBP40                       |
| 85 | CPIJ015733 | CquiOBP85*  | 293         | 3.670        | 27043   | 27906   | Two-domains | matype1 |                                | AaegOBP41                       |
| 86 | CPIJ009038 | CquiOBP86*  | 287         | 3.216        | 624714  | 626149  | Two-domains | matype3 |                                | AaegOBP32                       |
| 87 | CPIJ003865 | CquiOBP87*  | 313         | 3.54         | 1105231 | 1106267 | Two-domains | matype2 |                                | AaegOBP91                       |
| 88 | CPIJ003863 | CquiOBP88*  | 307         | 3.54         | 1100660 | 1101583 | Two-domains | matype2 |                                |                                 |
| 89 | CPIJ003866 | CquiOBP89*  | 307         | 3.54         | 1107587 | 1108531 | Two-domains | matype2 |                                |                                 |
| 90 | CPIJ003867 | CquiOBP90*  | 314         | 3.54         | 1112050 | 1113000 | Two-domains | matype2 |                                |                                 |

\*Newly discovered genes in this study.

# Only a two way (1:1) orthology has been established for these genes and not a three way (1:1:1) orthology.

nd : not determined

† New genes recently reported by Vieira & Rozas (2011)

| n°  | ID         | Name         | Full length | Super contig | Start   | End     | Sub-family  | Cluster | Ortholog in <i>An. gambiae</i> | Ortholog in <i>Ae. aegyptii</i> |
|-----|------------|--------------|-------------|--------------|---------|---------|-------------|---------|--------------------------------|---------------------------------|
| 91  | CPIJ001690 | CquiOBP91*   | 316         | 3.19         | 1064263 | 1065189 | Two-domains | matype2 |                                |                                 |
| 92  | CPIJ017342 | CquiOBP92*   | 308         | 3.908        | 23349   | 24732   | Two-domains | matype3 |                                |                                 |
| 93  | CPIJ017170 | CquiOBP93*   | 353         | 3.874        | 68127   | 69047   | Two-domains | matype2 |                                |                                 |
| 94  | CPIJ017166 | CquiOBP94*   | 306         | 3.874        | 53265   | 54562   | Two-domains | matype2 |                                | AaegOBP107                      |
| 95  | CPIJ017167 | CquiOBP95*   | 303         | 3.874        | 54671   | 57028   | Two-domains | matype2 |                                | AaegOBP98                       |
| 96  | CPIJ017164 | CquiOBP96*   | 506         | 3.874        | 42543   | 45345   | Two-domains | matype2 |                                |                                 |
| 97  | CPIJ017165 | CquiOBP97*   | 333         | 3.874        | 45828   | 48052   | Two-domains | matype2 |                                | AaegOBP106                      |
| 98  | CPIJ017163 | CquiOBP98*   | 309         | 3.874        | 40347   | 41997   | Two-domains | matype2 |                                |                                 |
| 99  | CPIJ017169 | CquiOBP99*   | 400         | 3.874        | 66534   | 67385   | Two-domains | matype2 |                                |                                 |
| 100 | CPIJ017168 | CquiOBP100*  | 274         | 3.874        | 59822   | 60630   | Two-domains | matype2 |                                |                                 |
| 101 | CPIJ008979 | CquiOBP101*  | 251         | 3.212        | 2741    | 3415    | PlusC       | mplus3  |                                | AaegOBP82                       |
| 102 | CPIJ004634 | CquiOBP102*  | 242         | 3.70         | 262125  | 262974  | PlusC       | mplus11 | AgamOBP56                      | AaegOBP26                       |
| 103 | CPIJ004635 | CquiOBP103*  | 228         | 3.70         | 268367  | 269111  | PlusC       | mplus11 |                                | AaegOBP70                       |
| 104 | CPIJ004630 | CquiOBP104*  | 204         | 3.70         | 243833  | 244540  | PlusC       | mplus11 | AgamOBP57                      | AaegOBP25                       |
| 105 | CPIJ002106 | CquiOBP105*  | 127         | 3.21         | 701497  | 701945  | PlusC       | mplus1  |                                |                                 |
| 106 | CPIJ002105 | CquiOBP106*  | 194         | 3.21         | 699415  | 700558  | PlusC       | mplus1  | AgamOBP48                      | AaegOBP42                       |
| 107 | CPIJ002109 | CquiOBP107*  | 195         | 3.21         | 708381  | 709996  | PlusC       | mplus5  |                                | AaegOBP75                       |
| 108 | CPIJ002108 | CquiOBP108*  | 205         | 3.21         | 705497  | 706243  | PlusC       | mplus2  | AgamOBP46                      | AaegOBP48                       |
| 109 | CPIJ006608 | CquiOBP109*  | 218         | 3.130        | 754816  | 760061  | PlusC       | mplus6  | AgamOBP58                      | AaegOBP5                        |
| 110 | CPIJ002111 | CquiOBP110#* | 191         | 3.21         | 713441  | 714192  | PlusC       | mplus4  | AgamOBP60#                     | AaegOBP53#                      |
| 111 | CPIJ008867 | CquiOBP111#* | 172         | 3.219        | 551750  | 552504  | PlusC       | mplus8  | AgamOBP54#                     | AaegOBP72#                      |
| 112 | CPIJ008868 | CquiOBP112*  | 175         | 3.219        | 554916  | 555746  | PlusC       | mplus8  | AgamOBP49                      | AaegOBP73                       |
| 113 | CPIJ017524 | CquiOBP113†  | 178         | 3.978        | 126190  | 127209  | PlusC       | nd      |                                |                                 |
| 114 | CPIJ007337 | CquiOBP114†  | 194         | 3.157        | 294891  | 306059  | PlusC       | nd      | AgamOBP70                      |                                 |

\*Newly discovered genes in this study.

# Only a two way (1:1) orthology has been established for these genes and not a three way (1:1:1) orthology.

nd : not determined

† New genes recently reported by Vieira & Rozas (2011)

**Supplementary Table 2.** Syntheny between chromosomes between the four dipterian species *Drosophila melanogaster*; *Anopheles gambiae*, *Aedes aegypti* and *Culex quinquefasciatus* (Arensburger *et al*, 2010).

| <b>Drosophila</b> | <b>Anopheles</b> | <b>Aedes</b> | <b>Culex</b> |
|-------------------|------------------|--------------|--------------|
| X                 | X                | 1p           | 1p           |
|                   |                  | 1q           | 1q           |
| 2L                | 3R               | 2q           | 2p           |
| 2R                | 3L               | 3q           | 2q           |
| 3L                | 2L               | 2p           | 3p & 2q      |
| 3R                | 2R               | 3p           | 3q & 1q      |

**Reference :** Peter Arensburger, *et al*. Sequencing of *Culex quinquefasciatus* Establishes a Platform for Mosquito Comparative Genomics. *Science* **330**:86-88, (2010).

**Supplementary Table 3a.** Signal P prediction results for all the *Anopheles gambiae* OBP sequences.

| # name                | Signal peptide | D value |
|-----------------------|----------------|---------|
| AGAP003309_AgamOBP1   | 1-19           | 0.868   |
| AGAP003306_AgamOBP2   | 1-25           | 0.853   |
| AGAP001409_AgamOBP3   | 1-29           | 0.83    |
| AGAP010489_AgamOBP4   | 1-25           | 0.678   |
| AGAP009629_AgamOBP5_  | not detected   | 0.397   |
| AGAP003530_AgamOBP6   | not detected   | 0.309   |
| AGAP001556_AgamOBP7   | not detected   | 0.48    |
| AGAP000279_AgamOBP8_  | 1-29           | 0.653   |
| AGAP000278_AgamOBP9   | 1-17           | 0.924   |
| AGAP001189_AgamOBP10  | 1-19           | 0.74    |
| AGAP002025_AgamOBP11_ | 1-18           | 0.637   |
| AGAP002188_AgamOBP12  | 1-27           | 0.841   |
| AGAP002905_AgamOBP13_ | 1-22           | 0.845   |
| AGAP002189_AgamOBP14_ | 1-26           | 0.756   |
| AGAP003307_AgamOBP15  | 1-18           | 0.674   |
| AGAP004433_AgamOBP19  | not detected   | 0.112   |
| AGAP005208_AgamOBP20_ | not detected   | 0.242   |
| AGAP008398_AgamOBP21_ | 1-20           | 0.646   |
| AGAP010409_AgamOBP22_ | 1-21           | 0.876   |
| AGAP012318_AgamOBP23_ | 1-19           | 0.909   |
| AGAP012319_AgamOBP24  | not detected   | 0.146   |
| AGAP012320_AgamOBP25_ | 1-23           | 0.704   |
| AGAP012321_AgamOBP26  | 1-18           | 0.864   |
| AGAP012323_AgamOBP27_ | 1-25           | 0.539   |
| AGAP012325_AgamOBP28_ | 1-16           | 0.812   |
| AGAP012331_AgamOBP29_ | not detected   | 0.446   |
| AGAP011647_AgamOBP30_ | not detected   | 0.377   |
| AGAP010649_AgamOBP31_ | 1-21           | 0.822   |
| AGAP000638_AgamOBP32_ | 1-25           | 0.6     |
| AGAP000640_AgamOBP33_ | 1-25           | 0.725   |
| AGAP000644_AgamOBP34_ | not detected   | 0.404   |
| AGAP000642_AgamOBP35  | 1-20           | 0.757   |
| AGAP000643_AgamOBP36  | 1-20           | 0.757   |
| AGAP000641_AgamOBP37  | not detected   | 0.404   |
| AGAP000580_AgamOBP38_ | 1-22           | 0.877   |
| AGAP002190_AgamOBP39_ | 1-24           | 0.847   |
| AGAP002191_AgamOBP40_ | 1-30           | 0.722   |
| AGAP005182_AgamOBP41_ | 1-28           | 0.795   |
| AGAP009065_AgamOBP42_ | 1-22           | 0.808   |
| AGAP009402_AgamOBP43_ | 1-26           | 0.87    |
| AGAP010648_AgamOBP44_ | 1-20           | 0.765   |
| AGAP010650_AgamOBP45_ | 1-28           | 0.794   |
| AGAP007289_AgamOBP46_ | 1-20           | 0.763   |
| AGAP007287_AgamOBP47_ | not detected   | 0.177   |
| AGAP007286_AgamOBP48_ | 1-28           | 0.814   |

| # name                | Signal peptide | D value |
|-----------------------|----------------|---------|
| AGAP006075_AgamOBP49_ | 1-25           | 0.855   |
| AGAP006076_AgamOBP50_ | not detected   | 0.385   |
| AGAP006077_AgamOBP51_ | 1-24           | 0.817   |
| AGAP006078_AgamOBP52_ | not detected   | 0.218   |
| AGAP006079_AgamOBP53  | not detected   | 0.25    |
| AGAP006080_AgamOBP54_ | 1-23           | 0.803   |
| AGAP006081_AgamOBP55_ | 1-27           | 0.733   |
| AGAP011367_AgamOBP56_ | 1-16           | 0.854   |
| AGAP011368_AgamOBP57_ | 1-19           | 0.836   |
| AGAP006074_AgamOBP58  | 1-35           | 0.561   |
| AGAP006760_AgamOBP59_ | not detected   | 0.119   |
| AGAP007281_AgamOBP60_ | 1-17           | 0.892   |
| AGAP007282_AgamOBP61_ | 1-22           | 0.869   |
| AGAP002556_AgamOBP62_ | 1-29           | 0.715   |
| AGAP012322_AgamOBP63_ | 1-19           | 0.809   |
| AGAP012324_AgamOBP64_ | 1-29           | 0.836   |
| AGAP006759_AgamOBP65  | not detected   | 0.311   |
| AGAP007283_AgamOBP66  | 1-28           | 0.926   |
| AGAP012659_AgamOBP67_ | 1-22           | 0.806   |
| AGAP012658_AgamOBP68_ | 1-28           | 0.935   |
| AGAP013182_AgamOBP69  | 1-20           | 0.828   |
| AGAP006368_AgamOBP70  | 1-29           | 0.704   |
| AGAP012867_AgamOBP71  | 1-20           | 0.769   |
| AGAP012714_AgamOBP72  | not detected   | 0.102   |

**Supplementary Table 3b.** Signal P prediction results for all the *Aedes aegypti* OBP sequences.

| # name               | Signal peptide | D value |
|----------------------|----------------|---------|
| AAEL009449_AaegOBP1  | 1-18           | 0.776   |
| AAEL006176_AaegOBP2  | 1-24           | 0.879   |
| AAEL013018_AaegOBP3  | 1-18           | 0.783   |
| AAEL000073_AaegOBP4  | 1-25           | 0.797   |
| AAEL000139_AaegOBP5  | 1-17           | 0.8     |
| AAEL000821_AaegOBP6  | 1-16           | 0.859   |
| AAEL000833_AaegOBP7  | 1-20           | 0.782   |
| AAEL001826_AaegOBP8  | 1-16           | 0.792   |
| AAEL002596_AaegOBP9  | 1-20           | 0.675   |
| AAEL007603_AaegOBP10 | 1-25           | 0.921   |
| AAEL002587_AaegOBP11 | 1-18           | 0.824   |
| AAEL002617_AaegOBP12 | 1-18           | 0.838   |
| AAEL002591_AaegOBP13 | 1-18           | 0.826   |
| AAEL002605_AaegOBP14 | 1-18           | 0.742   |
| AAEL002598_AaegOBP15 | 1-23           | 0.795   |
| AAEL003315_AaegOBP16 | 1-16           | 0.786   |
| AAEL004339_AaegOBP17 | 1-19           | 0.893   |
| AAEL004342_AaegOBP18 | 1-22           | 0.945   |
| AAEL004343_AaegOBP19 | 1-26           | 0.818   |
| AAEL005778_AaegOBP20 | 1-24           | 0.864   |
| AAEL005770_AaegOBP21 | 1-18           | 0.659   |
| AAEL005772_AaegOBP22 | 1-16           | 0.858   |
| AAEL006109_AaegOBP23 | 1-16           | 0.805   |
| AAEL006108_AaegOBP24 | 1-20           | 0.734   |
| AAEL006103_AaegOBP25 | 1-20           | 0.653   |
| AAEL006106_AaegOBP26 | not detected   | 0.103   |
| AAEL000071_AaegOBP27 | 1-21           | 0.727   |
| AAEL006393_AaegOBP28 | 1-18           | 0.823   |
| AAEL006387_AaegOBP29 | not detected   | 0.183   |
| AAEL006396_AaegOBP31 | 1-18           | 0.775   |
| AAEL006398_AaegOBP32 | 1-18           | 0.862   |
| AAEL006385_AaegOBP33 | 1-18           | 0.822   |
| AAEL014082_AaegOBP34 | 1-24           | 0.873   |
| AAEL002606_AaegOBP35 | 1-18           | 0.904   |
| AAEL008011_AaegOBP36 | 1-21           | 0.825   |
| AAEL008009_AaegOBP37 | 1-20           | 0.905   |
| AAEL008013_AaegOBP38 | 1-16           | 0.871   |
| AAEL006454_AaegOBP39 | 1-21           | 0.84    |
| AAEL009597_AaegOBP40 | 1-21           | 0.813   |
| AAEL009599_AaegOBP41 | 1-19           | 0.839   |
| AAEL010666_AaegOBP42 | not detected   | 0.101   |
| AAEL010662_AaegOBP43 | 1-20           | 0.828   |
| AAEL010718_AaegOBP44 | 1-22           | 0.78    |
| AAEL010714_AaegOBP45 | 1-22           | 0.771   |
| AAEL010872_AaegOBP46 | 1-21           | 0.851   |

| # name               | Signal peptide | D value |
|----------------------|----------------|---------|
| AAEL011499_AaegOBP47 | 1-20           | 0.847   |
| AAEL011494_AaegOBP48 | 1-20           | 0.887   |
| AAEL011484_AaegOBP49 | not detected   | 0.104   |
| AAEL011490_AaegOBP50 | not detected   | 0.139   |
| AAEL011487_AaegOBP51 | 1-21           | 0.914   |
| AAEL011491_AaegOBP52 | 1-20           | 0.843   |
| AAEL011482_AaegOBP53 | 1-17           | 0.639   |
| AAEL011481_AaegOBP54 | not detected   | 0.119   |
| AAEL012377_AaegOBP55 | 1-24           | 0.726   |
| AAEL000051_AaegOBP56 | not detected   | 0.1     |
| AAEL000035_AaegOBP57 | 1-26           | 0.529   |
| AAEL014430_AaegOBP58 | not detected   | 0.108   |
| AAEL015313_AaegOBP59 | 1-24           | 0.864   |
| AAEL015499_AaegOBP60 | 1-18           | 0.873   |
| AAEL015554_AaegOBP61 | 1-18           | 0.795   |
| AAEL015566_AaegOBP62 | 1-20           | 0.832   |
| AAEL015567_AaegOBP63 | not detected   | 0.101   |
| AAEL002618_AaegOBP65 | not detected   | 0.122   |
| AAEL002606_AaegOBP66 | 1-18           | 0.904   |
| AAEL011497_AaegOBP67 | not detected   | 0.143   |
| AAEL011489_AaegOBP68 | 1-16           | 0.788   |
| AAEL000124_AaegOBP69 | 1-24           | 0.819   |
| AAEL006105_AaegOBP70 | 1-17           | 0.825   |
| AAEL006094_AaegOBP71 | 1-17           | 0.757   |
| AAEL004729_AaegOBP72 | 1-23           | 0.693   |
| AAEL004730_AaegOBP73 | 1-22           | 0.91    |
| AAEL011486_AaegOBP74 | 1-19           | 0.83    |
| AAEL011483_AaegOBP75 | 1-19           | 0.795   |
| AAEL007604_AaegOBP76 | not detected   | 0.103   |
| AAEL002626_AaegOBP77 | 1-20           | 0.86    |
| AAEL001836_AaegOBP78 | 1-18           | 0.756   |
| AAEL007014_AaegOBP79 | 1-20           | 0.748   |
| AAEL007003_AaegOBP80 | 1-20           | 0.712   |
| AAEL011730_AaegOBP81 | 1-23           | 0.804   |
| AAEL014593_AaegOBP82 | not detected   | 0.097   |
| AAEL011416_AaegOBP83 | 1-29           | 0.9     |
| AAEL000827_AaegOBP84 | 1-20           | 0.696   |
| AAEL000831_AaegOBP85 | 1-20           | 0.758   |
| AAEL004856_AaegOBP86 | 1-20           | 0.86    |
| AAEL003511_AaegOBP87 | 1-24           | 0.641   |
| AAEL010874_AaegOBP88 | 1-24           | 0.614   |
| AAEL000377_AaegOBP89 | 1-19           | 0.545   |
| AAEL013719_AaegOBP90 | not detected   | 0.112   |
| AAEL013720_AaegOBP91 | 1-20           | 0.565   |
| AAEL000318_AaegOBP92 | 1-19           | 0.915   |
| AAEL000319_AaegOBP93 | 1-20           | 0.603   |
| AAEL000344_AaegOBP94 | 1-20           | 0.888   |

| # name                | Signal peptide | D value |
|-----------------------|----------------|---------|
| AAEL000350_AaegOBP95  | 1-19           | 0.884   |
| AAEL000796_AaegOBP96  | 1-18           | 0.674   |
| AAEL000835_AaegOBP97  | 1-18           | 0.599   |
| AAEL001174_AaegOBP98  | 1-22           | 0.681   |
| AAEL001179_AaegOBP99  | not detected   | 0.219   |
| AAEL003513_AaegOBP100 | 1-22           | 0.861   |
| AAEL003525_AaegOBP101 | not detected   | 0.111   |
| AAEL003538_AaegOBP102 | 1-22           | 0.861   |
| AAEL010875_AaegOBP103 | 1-24           | 0.609   |
| AAEL004516_AaegOBP104 | 1-18           | 0.896   |
| AAEL001189_AaegOBP105 | 1-22           | 0.782   |
| AAEL001153_AaegOBP106 | not detected   | 0.141   |
| AAEL014876_AaegOBP107 | 1-31           | 0.833   |
| AAEL014874_AaegOBP108 | 1-21           | 0.786   |
| AAEL009433_AaegOBP109 | 1-21           | 0.786   |

**Supplementary Table 3c.** Signal P prediction results for all the *Culex quinquefasciatus* OBP sequences.

| # name               | Signal peptide | D value |
|----------------------|----------------|---------|
| CPIJ007604_CquiOBP1  | 1-24           | 0.872   |
| CPIJ007617_CquiOBP2  | 1-22           | 0.889   |
| CPIJ007611_CQUIOBP3  | 1-18           | 0.857   |
| CPIJ001730_CquiOBP4  | 1-21           | 0.699   |
| CPIJ007608_CquiOBP5  | not detected   | 0.354   |
| CPIJ008793_CquiOBP6  | 1-21           | 0.838   |
| CPIJ001365_CquiOBP7  | not detected   | 0.107   |
| CPIJ009568_CquiOBP8  | 1-23           | 0.733   |
| CPIJ016948_CquiOBP9  | 1-20           | 0.597   |
| CPIJ013976_CquiOBP10 | not detected   | 0.235   |
| CPIJ006551_CquiOBP11 | 1-23           | 0.728   |
| CPIJ016949_CquiOBP12 | 1-20           | 0.597   |
| CPIJ016952_CquiOBP13 | 1-20           | 0.597   |
| CPIJ009586_CquiOBP14 | 1-20           | 0.807   |
| CPIJ012714_CquiOBP15 | 1-28           | 0.748   |
| CPIJ012715_CquiOBP16 | 1-20           | 0.844   |
| CPIJ012716_CquiOBP17 | 1-18           | 0.788   |
| CPIJ012717_CquiOBP18 | 1-18           | 0.857   |
| CPIJ012718_CquiOBP19 | 1-17           | 0.795   |
| CPIJ012719_CquiOBP20 | 1-18           | 0.806   |
| CPIJ012720_CquiOBP21 | 1-21           | 0.819   |
| CPIJ012721_CquiOBP22 | 1-19           | 0.565   |
| CPIJ001876_CquiOBP23 | 1-17           | 0.842   |
| CPIJ014525_CquiOBP24 | 1-23           | 0.525   |
| CPIJ010723_CquiOBP25 | 1-16           | 0.73    |
| CPIJ010724_CquiOBP26 | 1-15           | 0.838   |
| CPIJ010728_CquiOBP27 | 1-21           | 0.866   |
| CPIJ016965_CquiOBP28 | 1-20           | 0.844   |
| CPIJ016966_CquiOBP29 | not detected   | 0.128   |
| CPIJ016967_CquiOBP30 | 1-20           | 0.881   |
| CPIJ008285_CquiOBP31 | 1-16           | 0.865   |
| CPIJ016479_CquiOBP32 | 1-18           | 0.754   |
| CPIJ019607_CquiOBP33 | 1-19           | 0.771   |
| CPIJ019608_CquiOBP34 | not detected   | 0.117   |
| CPIJ019609_CquiOBP35 | 1-18           | 0.728   |
| CPIJ019610_CquiOBP36 | 1-18           | 0.803   |
| CPIJ007931_CquiOBP37 | not detected   | 0.161   |
| CPIJ007932_CquiOBP38 | 1-20           | 0.862   |
| CPIJ007933_CquiOBP39 | 1-18           | 0.715   |
| CPIJ007934_CquiOBP40 | not detected   | 0.114   |
| CPIJ007935_CquiOBP41 | not detected   | 0.109   |
| CPIJ007936_CquiOBP42 | not detected   | 0.107   |
| CPIJ017326_CquiOBP43 | 1-16           | 0.863   |
| CPIJ009937_CquiOBP44 | not detected   | 0.237   |

| # name               | Signal peptide | D value |
|----------------------|----------------|---------|
| CPIJ010782_CquiOBP46 | 1-22           | 0.629   |
| CPIJ010787_CquiOBP51 | 1-22           | 0.787   |
| CPIJ010788_CquiOBP52 | 1-19           | 0.817   |
| CPIJ010789_CquiOBP53 | 1-19           | 0.828   |
| CPIJ007937_CquiOBP54 | not detected   | 0.102   |
| CPIJ010367_CquiOBP55 | 1-25           | 0.936   |
| CPIJ010729_CquiOBP56 | not detected   | 0.1     |
| CPIJ016951_CquiOBP57 | 1-20           | 0.597   |
| CPIJ008979_CquiOBP58 | not detected   | 0.121   |
| CPIJ007609_CquiOBP59 | not detected   | 0.119   |
| CPIJ001871_CquiOBP60 | 1-18           | 0.877   |
| CPIJ012786_CquiOBP61 | 1-17           | 0.794   |
| CPIJ015943_CquiOBP62 | not detected   | 0.204   |
| CPIJ015944_CquiOBP63 | not detected   | 0.117   |
| CPIJ016343_CquiOBP64 | 1-40           | 0.766   |
| CPIJ004145_CquiOBP65 | 1-20           | 0.861   |
| CPIJ001875_CquiOBP66 | 1-17           | 0.872   |
| CPIJ001865_CquiOBP67 | 1-15           | 0.742   |
| CPIJ017432_CquiOBP68 | not detected   | 0.101   |
| CPIJ001873_CquiOBP69 | 1-20           | 0.82    |
| CPIJ001874_CquiOBP70 | not detected   | 0.097   |
| CPIJ001872_CquiOBP71 | 1-19           | 0.883   |
| CPIJ001870_CquiOBP72 | 1-17           | 0.781   |
| CPIJ001867_CquiOBP73 | not detected   | 0.108   |
| CPIJ001869_CquiOBP74 | 1-17           | 0.777   |
| CPIJ001868_CquiOBP75 | 1-20           | 0.697   |
| CPIJ008157_CquiOBP76 | 1-21           | 0.621   |
| CPIJ008158_CquiOBP77 | 1-16           | 0.621   |
| CPIJ008159_CquiOBP78 | 1-19           | 0.807   |
| CPIJ008155_CquiOBP79 | 1-20           | 0.727   |
| CPIJ008156_CquiOBP80 | 1-19           | 0.608   |
| CPIJ008160_CquiOBP81 | 1-19           | 0.725   |
| CPIJ008161_CquiOBP82 | not detected   | 0.218   |
| CPIJ008154_CquiOBP83 | 1-15           | 0.718   |
| CPIJ000653_CquiOBP84 | 1-15           | 0.823   |
| CPIJ015732_CquiOBP85 | 1-20           | 0.893   |
| CPIJ015733_CquiOBP86 | 1-19           | 0.741   |
| CPIJ009038_CquiOBP87 | not detected   | 0.109   |
| CPIJ003865_CquiOBP88 | 1-20           | 0.796   |
| CPIJ003863_CquiOBP89 | 1-20           | 0.748   |
| CPIJ003866_CquiOBP90 | 1-20           | 0.863   |
| CPIJ003867_CquiOBP91 | 1-20           | 0.838   |
| CPIJ001690_CquiOBP92 | 1-24           | 0.744   |
| CPIJ017342_CquiOBP93 | 1-18           | 0.851   |
| CPIJ017170_CquiOBP94 | 1-18           | 0.582   |
| CPIJ017166_CquiOBP95 | 1-28           | 0.76    |
| CPIJ017167_CquiOBP96 | 1-20           | 0.832   |

| # name                | Signal peptide | D value |
|-----------------------|----------------|---------|
| CPIJ017164_CquiOBP97  | not detected   | 0.496   |
| CPIJ017165_CquiOBP98  | not detected   | 0.462   |
| CPIJ017163_CquiOBP99  | not detected   | 0.14    |
| CPIJ017169_CquiOBP100 | not detected   | 0.35    |
| CPIJ017168_CquiOBP101 | 1-23           | 0.64    |
| CPIJ004634_CquiOBP102 | 1-16           | 0.886   |
| CPIJ004635_CquiOBP103 | 1-17           | 0.863   |
| CPIJ004630_CquiOBP104 | 1-19           | 0.823   |
| CPIJ002106_CquiOBP105 | not detected   | 0.158   |
| CPIJ002105_CquiOBP106 | 1-23           | 0.855   |
| CPIJ002109_CquiOBP107 | not detected   | 0.121   |
| CPIJ002108_CquiOBP108 | 1-20           | 0.921   |
| CPIJ006608_CquiOBP109 | 1-19           | 0.703   |
| CPIJ002111_CquiOBP110 | 1-18           | 0.82    |
| CPIJ008867_CquiOBP111 | 1-21           | 0.776   |
| CPIJ008868_CquiOBP112 | 1-22           | 0.903   |

**Supplementary Table 4a.** CDD domain predictions for *Classic* OBPs from *Anopheles gambiae*.

|                       |           |                                                |          |            |     |          |          |           |                      |            |             |
|-----------------------|-----------|------------------------------------------------|----------|------------|-----|----------|----------|-----------|----------------------|------------|-------------|
| #Batch CD-search tool |           | NIH/NLM/NCBI                                   |          |            |     |          |          |           |                      |            |             |
| #cdsid                |           | QM3-qcdsearch-7123E804E85D394-1EB89D7375F149F6 |          |            |     |          |          |           |                      |            |             |
| #datatype             |           | hits Concise data                              |          |            |     |          |          |           |                      |            |             |
| #status               |           | 0                                              |          |            |     |          |          |           |                      |            |             |
| #Start time           |           | 2012-10-03T08:42:46                            | Run time | 0:00:00:48 |     |          |          |           |                      |            |             |
| #status               |           | success                                        |          |            |     |          |          |           |                      |            |             |
| Query                 |           | Hit type                                       | PSSM-ID  | From       | To  | E-Value  | Bitscore | Accession | Short name           | Incomplete | Superfamily |
| Q#1 ->AGAP003309/Aga  | AgamOBP1  | specific                                       | 201769   | 42         | 138 | 1.78E-18 | 76.4527  | pfam01395 | PBP_GOBP             | -          | cl11600     |
| Q#1 ->AGAP003309/Aga  | AgamOBP1  | superfamily                                    | 209365   | 42         | 138 | 1.78E-18 | 76.4527  | cl11600   | PBP_GOBP superfamily | -          | -           |
| Q#1 ->AGAP003309/Aga  | AgamOBP2  | specific                                       | 201769   | 43         | 151 | 9.83E-22 | 85.3123  | pfam01395 | PBP_GOBP             | -          | cl11600     |
| Q#2 ->AGAP003306/Aga  | AgamOBP2  | superfamily                                    | 209365   | 43         | 151 | 9.83E-22 | 85.3123  | cl11600   | PBP_GOBP superfamily | -          | -           |
| Q#3 ->AGAP001409/Aga  | AgamOBP3  | specific                                       | 201769   | 34         | 147 | 2.89E-21 | 84.1567  | pfam01395 | PBP_GOBP             | -          | cl11600     |
| Q#3 ->AGAP001409/Aga  | AgamOBP3  | superfamily                                    | 209365   | 34         | 147 | 2.89E-21 | 84.1567  | cl11600   | PBP_GOBP superfamily | -          | -           |
| Q#4 ->AGAP010489/Aga  | AgamOBP4  | specific                                       | 201769   | 18         | 138 | 8.72E-18 | 74.5267  | pfam01395 | PBP_GOBP             | -          | cl11600     |
| Q#4 ->AGAP010489/Aga  | AgamOBP4  | superfamily                                    | 209365   | 18         | 138 | 8.72E-18 | 74.5267  | cl11600   | PBP_GOBP superfamily | -          | -           |
| Q#5 ->AGAP009629/Aga  | AgamOBP5  | specific                                       | 201769   | 28         | 149 | 2.58E-21 | 84.1567  | pfam01395 | PBP_GOBP             | -          | cl11600     |
| Q#5 ->AGAP009629/Aga  | AgamOBP5  | superfamily                                    | 209365   | 28         | 149 | 2.58E-21 | 84.1567  | cl11600   | PBP_GOBP superfamily | -          | -           |
| Q#6 ->AGAP003530/Aga  | AgamOBP6  | specific                                       | 201769   | 29         | 150 | 7.16E-19 | 77.6083  | pfam01395 | PBP_GOBP             | -          | cl11600     |
| Q#6 ->AGAP003530/Aga  | AgamOBP6  | superfamily                                    | 209365   | 29         | 150 | 7.16E-19 | 77.6083  | cl11600   | PBP_GOBP superfamily | -          | -           |
| Q#7 ->AGAP001556/Aga  | AgamOBP7  | specific                                       | 201769   | 23         | 141 | 4.16E-18 | 75.6823  | pfam01395 | PBP_GOBP             | -          | cl11600     |
| Q#7 ->AGAP001556/Aga  | AgamOBP7  | superfamily                                    | 209365   | 23         | 141 | 4.16E-18 | 75.6823  | cl11600   | PBP_GOBP superfamily | -          | -           |
| Q#8 ->AGAP000279/Aga  | AgamOBP8  | specific                                       | 201769   | 44         | 172 | 2.14E-13 | 62.9707  | pfam01395 | PBP_GOBP             | -          | cl11600     |
| Q#8 ->AGAP000279/Aga  | AgamOBP8  | superfamily                                    | 209365   | 44         | 172 | 2.14E-13 | 62.9707  | cl11600   | PBP_GOBP superfamily | -          | -           |
| Q#9 ->AGAP000278/Aga  | AgamOBP9  | specific                                       | 201769   | 18         | 129 | 2.43E-29 | 104.572  | pfam01395 | PBP_GOBP             | -          | cl11600     |
| Q#9 ->AGAP000278/Aga  | AgamOBP9  | superfamily                                    | 209365   | 18         | 129 | 2.43E-29 | 104.572  | cl11600   | PBP_GOBP superfamily | -          | -           |
| Q#10 ->AGAP001189/Aga | AgamOBP10 | specific                                       | 201769   | 58         | 127 | 5.33E-16 | 69.1339  | pfam01395 | PBP_GOBP             | N          | cl11600     |
| Q#10 ->AGAP001189/Aga | AgamOBP10 | superfamily                                    | 209365   | 58         | 127 | 5.33E-16 | 69.1339  | cl11600   | PBP_GOBP superfamily | N          | -           |
| Q#11 ->AGAP002025/Aga | AgamOBP11 | specific                                       | 201769   | 51         | 161 | 1.57E-14 | 66.4375  | pfam01395 | PBP_GOBP             | -          | cl11600     |
| Q#11 ->AGAP002025/Aga | AgamOBP11 | superfamily                                    | 209365   | 51         | 161 | 1.57E-14 | 66.4375  | cl11600   | PBP_GOBP superfamily | -          | -           |
| Q#12 ->AGAP002188/Aga | AgamOBP12 | specific                                       | 201769   | 20         | 140 | 6.98E-17 | 72.6007  | pfam01395 | PBP_GOBP             | -          | cl11600     |
| Q#12 ->AGAP002188/Aga | AgamOBP12 | superfamily                                    | 209365   | 20         | 140 | 6.98E-17 | 72.6007  | cl11600   | PBP_GOBP superfamily | -          | -           |
| Q#13 ->AGAP002905/Aga | AgamOBP13 | specific                                       | 201769   | 37         | 155 | 4.33E-19 | 79.1491  | pfam01395 | PBP_GOBP             | -          | cl11600     |
| Q#13 ->AGAP002905/Aga | AgamOBP13 | superfamily                                    | 209365   | 37         | 155 | 4.33E-19 | 79.1491  | cl11600   | PBP_GOBP superfamily | -          | -           |
| Q#14 ->AGAP002189/Aga | AgamOBP14 | specific                                       | 201769   | 21         | 141 | 2.18E-14 | 65.2819  | pfam01395 | PBP_GOBP             | -          | cl11600     |
| Q#14 ->AGAP002189/Aga | AgamOBP14 | superfamily                                    | 209365   | 21         | 141 | 2.18E-14 | 65.2819  | cl11600   | PBP_GOBP superfamily | -          | -           |
| Q#15 ->AGAP003307/Aga | AgamOBP15 | specific                                       | 201769   | 14         | 135 | 4.58E-20 | 80.6899  | pfam01395 | PBP_GOBP             | -          | cl11600     |
| Q#15 ->AGAP003307/Aga | AgamOBP15 | superfamily                                    | 209365   | 14         | 135 | 4.58E-20 | 80.6899  | cl11600   | PBP_GOBP superfamily | -          | -           |
| Q#16 ->AGAP004433/Aga | AgamOBP19 | specific                                       | 201769   | 17         | 132 | 4.75E-18 | 74.9119  | pfam01395 | PBP_GOBP             | -          | cl11600     |

**Supplementary Table 4a.** CDD domain predictions for *Classic* OBPs from *Anopheles gambiae*.

|                        |           |             |        |    |     |            |         |           |                      |   |         |
|------------------------|-----------|-------------|--------|----|-----|------------|---------|-----------|----------------------|---|---------|
| Q#16 - >AGAP004433/Aga | AgamOBP19 | superfamily | 209365 | 17 | 132 | 4.75E-18   | 74.9119 | cl11600   | PBP_GOBP superfamily | - | -       |
| Q#17 - >AGAP005208/Aga | AgamOBP20 | specific    | 201769 | 23 | 137 | 1.22E-19   | 79.5343 | pfam01395 | PBP_GOBP             | - | cl11600 |
| Q#17 - >AGAP005208/Aga | AgamOBP20 | superfamily | 209365 | 23 | 137 | 1.22E-19   | 79.5343 | cl11600   | PBP_GOBP superfamily | - | -       |
| Q#18 - >AGAP008398/Aga | AgamOBP21 | specific    | 201769 | 6  | 127 | 1.33E-18   | 76.4527 | pfam01395 | PBP_GOBP             | - | cl11600 |
| Q#18 - >AGAP008398/Aga | AgamOBP21 | superfamily | 209365 | 6  | 127 | 1.33E-18   | 76.4527 | cl11600   | PBP_GOBP superfamily | - | -       |
| Q#19 - >AGAP010409/Aga | AgamOBP22 | specific    | 201769 | 19 | 133 | 4.96E-16   | 69.9043 | pfam01395 | PBP_GOBP             | - | cl11600 |
| Q#19 - >AGAP010409/Aga | AgamOBP22 | superfamily | 209365 | 19 | 133 | 4.96E-16   | 69.9043 | cl11600   | PBP_GOBP superfamily | - | -       |
| Q#20 - >AGAP012318/Aga | AgamOBP23 | specific    | 201769 | 10 | 128 | 2.19E-23   | 88.7791 | pfam01395 | PBP_GOBP             | - | cl11600 |
| Q#20 - >AGAP012318/Aga | AgamOBP23 | superfamily | 209365 | 10 | 128 | 2.19E-23   | 88.7791 | cl11600   | PBP_GOBP superfamily | - | -       |
| Q#21 - >AGAP012319/Aga | AgamOBP24 | specific    | 201769 | 56 | 157 | 2.66E-18   | 76.8379 | pfam01395 | PBP_GOBP             | - | cl11600 |
| Q#21 - >AGAP012319/Aga | AgamOBP24 | superfamily | 209365 | 56 | 157 | 2.66E-18   | 76.8379 | cl11600   | PBP_GOBP superfamily | - | -       |
| Q#22 - >AGAP012320/Aga | AgamOBP25 | specific    | 201769 | 70 | 138 | 1.09E-17   | 74.1415 | pfam01395 | PBP_GOBP             | N | cl11600 |
| Q#22 - >AGAP012320/Aga | AgamOBP25 | superfamily | 209365 | 70 | 138 | 1.09E-17   | 74.1415 | cl11600   | PBP_GOBP superfamily | N | -       |
| Q#23 - >AGAP012321/Aga | AgamOBP26 | specific    | 201769 | 9  | 128 | 6.24E-26   | 95.7127 | pfam01395 | PBP_GOBP             | - | cl11600 |
| Q#23 - >AGAP012321/Aga | AgamOBP26 | superfamily | 209365 | 9  | 128 | 6.24E-26   | 95.7127 | cl11600   | PBP_GOBP superfamily | - | -       |
| Q#24 - >AGAP012323/Aga | AgamOBP27 | specific    | 201769 | 60 | 125 | 4.22E-14   | 64.1263 | pfam01395 | PBP_GOBP             | N | cl11600 |
| Q#24 - >AGAP012323/Aga | AgamOBP27 | superfamily | 209365 | 60 | 125 | 4.22E-14   | 64.1263 | cl11600   | PBP_GOBP superfamily | N | -       |
| Q#25 - >AGAP012325/Aga | AgamOBP28 | specific    | 201769 | 9  | 130 | 1.10E-22   | 87.2383 | pfam01395 | PBP_GOBP             | - | cl11600 |
| Q#25 - >AGAP012325/Aga | AgamOBP28 | superfamily | 209365 | 9  | 130 | 1.10E-22   | 87.2383 | cl11600   | PBP_GOBP superfamily | - | -       |
| Q#26 - >AGAP012331/Aga | AgamOBP29 | superfamily | 209365 | 81 | 157 | 0.00234741 | 35.2364 | cl11600   | PBP_GOBP superfamily | N | -       |
| Q#59 - >AGAP002556/Aga | AgamOBP62 | specific    | 201769 | 49 | 161 | 5.18E-10   | 53.3407 | pfam01395 | PBP_GOBP             | - | cl11600 |
| Q#59 - >AGAP002556/Aga | AgamOBP62 | superfamily | 209365 | 49 | 161 | 5.18E-10   | 53.3407 | cl11600   | PBP_GOBP superfamily | - | -       |
| Q#60 - >AGAP012322/Aga | AgamOBP63 | specific    | 201769 | 11 | 130 | 9.57E-28   | 100.335 | pfam01395 | PBP_GOBP             | - | cl11600 |
| Q#60 - >AGAP012322/Aga | AgamOBP63 | superfamily | 209365 | 11 | 130 | 9.57E-28   | 100.335 | cl11600   | PBP_GOBP superfamily | - | -       |
| Q#61 - >AGAP012324/Aga | AgamOBP64 | specific    | 201769 | 30 | 133 | 3.91E-16   | 69.9043 | pfam01395 | PBP_GOBP             | - | cl11600 |
| Q#61 - >AGAP012324/Aga | AgamOBP64 | superfamily | 209365 | 30 | 133 | 3.91E-16   | 69.9043 | cl11600   | PBP_GOBP superfamily | - | -       |
| Q#69 - >AGAP012714/Aga | AgamOBP72 | specific    | 201769 | 1  | 116 | 8.23E-18   | 73.7563 | pfam01395 | PBP_GOBP             | - | cl11600 |
| Q#69 - >AGAP012714/Aga | AgamOBP72 | superfamily | 209365 | 1  | 116 | 8.23E-18   | 73.7563 | cl11600   | PBP_GOBP superfamily | - | -       |

**Supplementary Table 4b.** CDD domain predictions for *Classic* OBPs from *Aedes aegypti*.

|                        |           |                                                |          |            |     |          |          |           |                      |            |             |
|------------------------|-----------|------------------------------------------------|----------|------------|-----|----------|----------|-----------|----------------------|------------|-------------|
| #Batch CD-search tool  |           | NIH/NLM/NCBI                                   |          |            |     |          |          |           |                      |            |             |
| #cdsid                 |           | QM3-qcdsearch-1D7EE3C6BCF9E4C3-94BF4515A2BFB89 |          |            |     |          |          |           |                      |            |             |
| #datatype              |           | hits Concise data                              |          |            |     |          |          |           |                      |            |             |
| #status                |           | 0                                              |          |            |     |          |          |           |                      |            |             |
| #Start time            |           | 2012-10-03T09:09:54                            | Run time | 0:00:01:28 |     |          |          |           |                      |            |             |
| #status                |           | success                                        |          |            |     |          |          |           |                      |            |             |
| Query                  |           | Hit type                                       | PSSM-ID  | From       | To  | E-Value  | Bitscore | Accession | Short name           | Incomplete | Superfamily |
| Q#1 - >AAEL009449/Aae  | AaegOBP1  | specific                                       | 201769   | 17         | 140 | 2.11E-17 | 73.3711  | pfam01395 | PBP_GOBP             | -          | cl11600     |
| Q#1 - >AAEL009449/Aae  | AaegOBP1  | superfamily                                    | 209365   | 17         | 140 | 2.11E-17 | 73.3711  | cl11600   | PBP_GOBP superfamily | -          | -           |
| Q#2 - >AAEL006176/Aae  | AaegOBP2  | specific                                       | 201769   | 21         | 136 | 4.49E-19 | 77.9935  | pfam01395 | PBP_GOBP             | -          | cl11600     |
| Q#2 - >AAEL006176/Aae  | AaegOBP2  | superfamily                                    | 209365   | 21         | 136 | 4.49E-19 | 77.9935  | cl11600   | PBP_GOBP superfamily | -          | -           |
| Q#3 - >AAEL013018/Aae  | AaegOBP3  | specific                                       | 201769   | 1          | 110 | 2.25E-17 | 72.6007  | pfam01395 | PBP_GOBP             | -          | cl11600     |
| Q#3 - >AAEL013018/Aae  | AaegOBP3  | superfamily                                    | 209365   | 1          | 110 | 2.25E-17 | 72.6007  | cl11600   | PBP_GOBP superfamily | -          | -           |
| Q#4 - >AAEL000073/Aae  | AaegOBP4  | specific                                       | 201769   | 22         | 141 | 2.28E-16 | 70.6747  | pfam01395 | PBP_GOBP             | -          | cl11600     |
| Q#4 - >AAEL000073/Aae  | AaegOBP4  | superfamily                                    | 209365   | 22         | 141 | 2.28E-16 | 70.6747  | cl11600   | PBP_GOBP superfamily | -          | -           |
| Q#8 - >AAEL001826/Aae  | AaegOBP8  | specific                                       | 201769   | 8          | 130 | 3.55E-21 | 83.0011  | pfam01395 | PBP_GOBP             | -          | cl11600     |
| Q#8 - >AAEL001826/Aae  | AaegOBP8  | superfamily                                    | 209365   | 8          | 130 | 3.55E-21 | 83.0011  | cl11600   | PBP_GOBP superfamily | -          | -           |
| Q#9 - >AAEL002596/Aae  | AaegOBP9  | specific                                       | 201769   | 11         | 130 | 2.71E-26 | 96.4831  | pfam01395 | PBP_GOBP             | -          | cl11600     |
| Q#9 - >AAEL002596/Aae  | AaegOBP9  | superfamily                                    | 209365   | 11         | 130 | 2.71E-26 | 96.4831  | cl11600   | PBP_GOBP superfamily | -          | -           |
| Q#10 - >AAEL007603/Aae | AaegOBP10 | specific                                       | 201769   | 34         | 136 | 2.90E-23 | 88.7791  | pfam01395 | PBP_GOBP             | -          | cl11600     |
| Q#10 - >AAEL007603/Aae | AaegOBP10 | superfamily                                    | 209365   | 34         | 136 | 2.90E-23 | 88.7791  | cl11600   | PBP_GOBP superfamily | -          | -           |
| Q#11 - >AAEL002587/Aae | AaegOBP11 | specific                                       | 201769   | 10         | 133 | 5.18E-25 | 93.4015  | pfam01395 | PBP_GOBP             | -          | cl11600     |
| Q#11 - >AAEL002587/Aae | AaegOBP11 | superfamily                                    | 209365   | 10         | 133 | 5.18E-25 | 93.4015  | cl11600   | PBP_GOBP superfamily | -          | -           |
| Q#12 - >AAEL002617/Aae | AaegOBP12 | specific                                       | 201769   | 9          | 128 | 2.09E-21 | 83.7715  | pfam01395 | PBP_GOBP             | -          | cl11600     |
| Q#12 - >AAEL002617/Aae | AaegOBP12 | superfamily                                    | 209365   | 9          | 128 | 2.09E-21 | 83.7715  | cl11600   | PBP_GOBP superfamily | -          | -           |
| Q#13 - >AAEL002591/Aae | AaegOBP13 | specific                                       | 201769   | 9          | 128 | 2.67E-26 | 96.4831  | pfam01395 | PBP_GOBP             | -          | cl11600     |
| Q#13 - >AAEL002591/Aae | AaegOBP13 | superfamily                                    | 209365   | 9          | 128 | 2.67E-26 | 96.4831  | cl11600   | PBP_GOBP superfamily | -          | -           |
| Q#14 - >AAEL002605/Aae | AaegOBP14 | specific                                       | 201769   | 9          | 128 | 6.32E-27 | 98.4091  | pfam01395 | PBP_GOBP             | -          | cl11600     |
| Q#14 - >AAEL002605/Aae | AaegOBP14 | superfamily                                    | 209365   | 9          | 128 | 6.32E-27 | 98.4091  | cl11600   | PBP_GOBP superfamily | -          | -           |
| Q#15 - >AAEL002598/Aae | AaegOBP15 | specific                                       | 201769   | 9          | 127 | 3.76E-19 | 77.9935  | pfam01395 | PBP_GOBP             | -          | cl11600     |
| Q#15 - >AAEL002598/Aae | AaegOBP15 | superfamily                                    | 209365   | 9          | 127 | 3.76E-19 | 77.9935  | cl11600   | PBP_GOBP superfamily | -          | -           |
| Q#17 - >AAEL004339/Aae | AaegOBP17 | specific                                       | 201769   | 4          | 127 | 1.24E-12 | 60.2743  | pfam01395 | PBP_GOBP             | -          | cl11600     |
| Q#17 - >AAEL004339/Aae | AaegOBP17 | superfamily                                    | 209365   | 4          | 127 | 1.24E-12 | 60.2743  | cl11600   | PBP_GOBP superfamily | -          | -           |
| Q#18 - >AAEL004342/Aae | AaegOBP18 | specific                                       | 201769   | 27         | 135 | 5.17E-15 | 66.8227  | pfam01395 | PBP_GOBP             | -          | cl11600     |
| Q#18 - >AAEL004342/Aae | AaegOBP18 | superfamily                                    | 209365   | 27         | 135 | 5.17E-15 | 66.8227  | cl11600   | PBP_GOBP superfamily | -          | -           |
| Q#19 - >AAEL004343/Aae | AaegOBP19 | specific                                       | 201769   | 32         | 140 | 9.75E-16 | 69.1339  | pfam01395 | PBP_GOBP             | -          | cl11600     |
| Q#19 - >AAEL004343/Aae | AaegOBP19 | superfamily                                    | 209365   | 32         | 140 | 9.75E-16 | 69.1339  | cl11600   | PBP_GOBP superfamily | -          | -           |
| Q#20 - >AAEL005778/Aae | AaegOBP20 | specific                                       | 201769   | 55         | 150 | 1.19E-12 | 60.6595  | pfam01395 | PBP_GOBP             | -          | cl11600     |
| Q#20 - >AAEL005778/Aae | AaegOBP20 | superfamily                                    | 209365   | 55         | 150 | 1.19E-12 | 60.6595  | cl11600   | PBP_GOBP superfamily | -          | -           |

**Supplementary Table 4b.** CDD domain predictions for *Classic* OBPs from *Aedes aegypti*.

|                       |           |             |        |    |     |          |         |           |                      |   |         |
|-----------------------|-----------|-------------|--------|----|-----|----------|---------|-----------|----------------------|---|---------|
| Q#21 ->AAEL005770/Aae | AaegOBP21 | specific    | 201769 | 12 | 135 | 1.66E-19 | 79.1491 | pfam01395 | PBP_GOBP             | - | cl11600 |
| Q#21 ->AAEL005770/Aae | AaegOBP21 | superfamily | 209365 | 12 | 135 | 1.66E-19 | 79.1491 | cl11600   | PBP_GOBP superfamily | - | -       |
| Q#22 ->AAEL005772/Aae | AaegOBP22 | specific    | 201769 | 17 | 128 | 1.66E-25 | 94.5571 | pfam01395 | PBP_GOBP             | - | cl11600 |
| Q#22 ->AAEL005772/Aae | AaegOBP22 | superfamily | 209365 | 17 | 128 | 1.66E-25 | 94.5571 | cl11600   | PBP_GOBP superfamily | - | -       |
| Q#27 ->AAEL000071/Aae | AaegOBP27 | specific    | 201769 | 32 | 142 | 1.47E-14 | 66.0523 | pfam01395 | PBP_GOBP             | - | cl11600 |
| Q#27 ->AAEL000071/Aae | AaegOBP27 | superfamily | 209365 | 32 | 142 | 1.47E-14 | 66.0523 | cl11600   | PBP_GOBP superfamily | - | -       |
| Q#33 ->AAEL014082/Aae | AaegOBP34 | specific    | 201769 | 22 | 137 | 1.05E-13 | 63.3559 | pfam01395 | PBP_GOBP             | - | cl11600 |
| Q#33 ->AAEL014082/Aae | AaegOBP34 | superfamily | 209365 | 22 | 137 | 1.05E-13 | 63.3559 | cl11600   | PBP_GOBP superfamily | - | -       |
| Q#34 ->AAEL002606/Aae | AaegOBP35 | specific    | 201769 | 23 | 127 | 2.70E-20 | 80.6899 | pfam01395 | PBP_GOBP             | - | cl11600 |
| Q#34 ->AAEL002606/Aae | AaegOBP35 | superfamily | 209365 | 23 | 127 | 2.70E-20 | 80.6899 | cl11600   | PBP_GOBP superfamily | - | -       |
| Q#35 ->AAEL008011/Aae | AaegOBP36 | specific    | 201769 | 49 | 145 | 2.52E-20 | 81.4603 | pfam01395 | PBP_GOBP             | - | cl11600 |
| Q#35 ->AAEL008011/Aae | AaegOBP36 | superfamily | 209365 | 49 | 145 | 2.52E-20 | 81.4603 | cl11600   | PBP_GOBP superfamily | - | -       |
| Q#36 ->AAEL008009/Aae | AaegOBP37 | specific    | 201769 | 24 | 143 | 1.33E-13 | 62.9707 | pfam01395 | PBP_GOBP             | - | cl11600 |
| Q#36 ->AAEL008009/Aae | AaegOBP37 | superfamily | 209365 | 24 | 143 | 1.33E-13 | 62.9707 | cl11600   | PBP_GOBP superfamily | - | -       |
| Q#37 ->AAEL008013/Aae | AaegOBP38 | specific    | 201769 | 21 | 134 | 5.36E-22 | 85.6975 | pfam01395 | PBP_GOBP             | - | cl11600 |
| Q#37 ->AAEL008013/Aae | AaegOBP38 | superfamily | 209365 | 21 | 134 | 5.36E-22 | 85.6975 | cl11600   | PBP_GOBP superfamily | - | -       |
| Q#38 ->AAEL006454/Aae | AaegOBP39 | specific    | 201769 | 20 | 137 | 8.19E-24 | 90.3199 | pfam01395 | PBP_GOBP             | - | cl11600 |
| Q#38 ->AAEL006454/Aae | AaegOBP49 | superfamily | 209365 | 20 | 137 | 8.19E-24 | 90.3199 | cl11600   | PBP_GOBP superfamily | - | -       |
| Q#54 ->AAEL012377/Aae | AaegOBP55 | specific    | 201769 | 26 | 146 | 5.16E-20 | 80.6899 | pfam01395 | PBP_GOBP             | - | cl11600 |
| Q#54 ->AAEL012377/Aae | AaegOBP55 | superfamily | 209365 | 26 | 146 | 5.16E-20 | 80.6899 | cl11600   | PBP_GOBP superfamily | - | -       |
| Q#55 ->AAEL000051/Aae | AaegOBP56 | specific    | 201769 | 20 | 137 | 5.21E-23 | 88.3939 | pfam01395 | PBP_GOBP             | - | cl11600 |
| Q#55 ->AAEL000051/Aae | AaegOBP56 | superfamily | 209365 | 20 | 137 | 5.21E-23 | 88.3939 | cl11600   | PBP_GOBP superfamily | - | -       |
| Q#56 ->AAEL000035/Aae | AaegOBP57 | specific    | 201769 | 23 | 142 | 9.89E-13 | 60.6595 | pfam01395 | PBP_GOBP             | - | cl11600 |
| Q#56 ->AAEL000035/Aae | AaegOBP57 | superfamily | 209365 | 23 | 142 | 9.89E-13 | 60.6595 | cl11600   | PBP_GOBP superfamily | - | -       |
| Q#58 ->AAEL015313/Aae | AaegOBP59 | specific    | 201769 | 55 | 150 | 1.09E-12 | 60.6595 | pfam01395 | PBP_GOBP             | - | cl11600 |
| Q#58 ->AAEL015313/Aae | AaegOBP59 | superfamily | 209365 | 55 | 150 | 1.09E-12 | 60.6595 | cl11600   | PBP_GOBP superfamily | - | -       |
| Q#59 ->AAEL015499/Aae | AaegOBP60 | specific    | 201769 | 23 | 140 | 5.96E-20 | 80.3047 | pfam01395 | PBP_GOBP             | - | cl11600 |
| Q#59 ->AAEL015499/Aae | AaegOBP60 | superfamily | 209365 | 23 | 140 | 5.96E-20 | 80.3047 | cl11600   | PBP_GOBP superfamily | - | -       |
| Q#60 ->AAEL015554/Aae | AaegOBP61 | specific    | 201769 | 9  | 128 | 1.62E-26 | 97.2535 | pfam01395 | PBP_GOBP             | - | cl11600 |
| Q#60 ->AAEL015554/Aae | AaegOBP61 | superfamily | 209365 | 9  | 128 | 1.62E-26 | 97.2535 | cl11600   | PBP_GOBP superfamily | - | -       |
| Q#63 ->AAEL002618/Aae | AaegOBP65 | specific    | 201769 | 2  | 88  | 8.06E-18 | 72.9859 | pfam01395 | PBP_GOBP             | N | cl11600 |
| Q#63 ->AAEL002618/Aae | AaegOBP65 | superfamily | 209365 | 2  | 88  | 8.06E-18 | 72.9859 | cl11600   | PBP_GOBP superfamily | N | -       |
| Q#74 ->AAEL007604/Aae | AaegOBP76 | specific    | 201769 | 17 | 133 | 1.60E-19 | 78.7639 | pfam01395 | PBP_GOBP             | - | cl11600 |
| Q#74 ->AAEL007604/Aae | AaegOBP76 | superfamily | 209365 | 17 | 133 | 1.60E-19 | 78.7639 | cl11600   | PBP_GOBP superfamily | - | -       |
| Q#75 ->AAEL002626/Aae | AaegOBP77 | specific    | 201769 | 20 | 129 | 2.16E-19 | 78.7639 | pfam01395 | PBP_GOBP             | - | cl11600 |
| Q#75 ->AAEL002626/Aae | AaegOBP77 | superfamily | 209365 | 20 | 129 | 2.16E-19 | 78.7639 | cl11600   | PBP_GOBP superfamily | - | -       |
| Q#76 ->AAEL001836/Aae | AaegOBP78 | specific    | 201769 | 10 | 131 | 7.82E-13 | 60.6595 | pfam01395 | PBP_GOBP             | - | cl11600 |
| Q#76 ->AAEL001836/Aae | AaegOBP78 | superfamily | 209365 | 10 | 131 | 7.82E-13 | 60.6595 | cl11600   | PBP_GOBP superfamily | - | -       |
| Q#77 ->AAEL007014/Aae | AaegOBP79 | specific    | 201769 | 16 | 136 | 1.06E-15 | 69.1339 | pfam01395 | PBP_GOBP             | - | cl11600 |
| Q#77 ->AAEL007014/Aae | AaegOBP79 | superfamily | 209365 | 16 | 136 | 1.06E-15 | 69.1339 | cl11600   | PBP_GOBP superfamily | - | -       |

**Supplementary Table 4b.** CDD domain predictions for *Classic* OBPs from *Aedes aegypti*.

|                       |           |             |        |     |     |          |         |           |                      |   |         |
|-----------------------|-----------|-------------|--------|-----|-----|----------|---------|-----------|----------------------|---|---------|
| Q#78 ->AAEL007003/Aae | AaegOBP80 | specific    | 201769 | 15  | 139 | 2.28E-17 | 73.7563 | pfam01395 | PBP_GOBP             | - | cl11600 |
| Q#78 ->AAEL007003/Aae | AaegOBP80 | superfamily | 209365 | 15  | 139 | 2.28E-17 | 73.7563 | cl11600   | PBP_GOBP superfamily | - | -       |
| Q#79 ->AAEL011730/Aae | AaegOBP81 | specific    | 201769 | 9   | 136 | 2.65E-21 | 84.1567 | pfam01395 | PBP_GOBP             | - | cl11600 |
| Q#79 ->AAEL011730/Aae | AaegOBP82 | superfamily | 209365 | 9   | 136 | 2.65E-21 | 84.1567 | cl11600   | PBP_GOBP superfamily | - | -       |
| Q#81 ->AAEL011416/Aae | AaegOBP83 | specific    | 201769 | 210 | 286 | 3.97E-05 | 41.0143 | pfam01395 | PBP_GOBP             | N | cl11600 |
| Q#81 ->AAEL011416/Aae | AaegOBP83 | superfamily | 209365 | 210 | 286 | 3.97E-05 | 41.0143 | cl11600   | PBP_GOBP superfamily | N | -       |

**Supplementary Table 4c.** CDD domain predictions for *Classic* OBPs from *Culex quinquefasciatus*.

|                        |           |                                                 |            |      |     |          |          |           |                      |            |             |  |
|------------------------|-----------|-------------------------------------------------|------------|------|-----|----------|----------|-----------|----------------------|------------|-------------|--|
| #Batch CD-search tool  |           | NIH/NLM/NCBI                                    |            |      |     |          |          |           |                      |            |             |  |
| #cdsid                 |           | QM3-qcdsearch-17F5D46C7CDF52FF-31922A2D6D85A9EB |            |      |     |          |          |           |                      |            |             |  |
| #datatype              |           | hits Concise data                               |            |      |     |          |          |           |                      |            |             |  |
| #status                |           | 0                                               |            |      |     |          |          |           |                      |            |             |  |
| #Start time            |           | 2012-09-27T06:55: Run time                      | 0:00:01:10 |      |     |          |          |           |                      |            |             |  |
| #status                |           | success                                         |            |      |     |          |          |           |                      |            |             |  |
| Query                  |           | Hit type                                        | PSSM-ID    | From | To  | E-Value  | Bitscore | Accession | Short name           | Incomplete | Superfamily |  |
| Q#1 - >CPIJ007604/Cqu  | CquiOBP1  | specific                                        | 201769     | 47   | 143 | 3.09E-20 | 81.0751  | pfam01395 | PBP_GOBP             | -          | cl11600     |  |
| Q#1 - >CPIJ007604/Cqu  | CquiOBP1  | superfamily                                     | 209365     | 47   | 143 | 3.09E-20 | 81.0751  | cl11600   | PBP_GOBP superfamily | -          | -           |  |
| Q#2 - >CPIJ007617/Cqu  | CquiOBP2  | specific                                        | 201769     | 27   | 140 | 4.51E-21 | 83.3863  | pfam01395 | PBP_GOBP             | -          | cl11600     |  |
| Q#2 - >CPIJ007617/Cqu  | CquiOBP2  | superfamily                                     | 209365     | 27   | 140 | 4.51E-21 | 83.3863  | cl11600   | PBP_GOBP superfamily | -          | -           |  |
| Q#3 - >CPIJ007611/CQU  | CquiOBP3  | specific                                        | 201769     | 39   | 136 | 3.06E-20 | 81.0751  | pfam01395 | PBP_GOBP             | -          | cl11600     |  |
| Q#3 - >CPIJ007611/CQU  | CquiOBP3  | superfamily                                     | 209365     | 39   | 136 | 3.06E-20 | 81.0751  | cl11600   | PBP_GOBP superfamily | -          | -           |  |
| Q#4 - >CPIJ001730/Cqu  | CquiOBP4  | specific                                        | 201769     | 28   | 144 | 4.83E-15 | 67.2079  | pfam01395 | PBP_GOBP             | -          | cl11600     |  |
| Q#4 - >CPIJ001730/Cqu  | CquiOBP4  | superfamily                                     | 209365     | 28   | 144 | 4.83E-15 | 67.2079  | cl11600   | PBP_GOBP superfamily | -          | -           |  |
| Q#5 - >CPIJ007608/Cqu  | CquiOBP5  | specific                                        | 201769     | 37   | 137 | 2.47E-19 | 78.7639  | pfam01395 | PBP_GOBP             | -          | cl11600     |  |
| Q#5 - >CPIJ007608/Cqu  | CquiOBP5  | superfamily                                     | 209365     | 37   | 137 | 2.47E-19 | 78.7639  | cl11600   | PBP_GOBP superfamily | -          | -           |  |
| Q#7 - >CPIJ001365/Cqu  | CquiOBP7  | specific                                        | 201769     | 5    | 122 | 5.01E-17 | 72.2155  | pfam01395 | PBP_GOBP             | -          | cl11600     |  |
| Q#7 - >CPIJ001365/Cqu  | CquiOBP7  | superfamily                                     | 209365     | 5    | 122 | 5.01E-17 | 72.2155  | cl11600   | PBP_GOBP superfamily | -          | -           |  |
| Q#8 - >CPIJ009568/Cqu  | CquiOBP8  | specific                                        | 201769     | 20   | 139 | 4.93E-19 | 77.9935  | pfam01395 | PBP_GOBP             | -          | cl11600     |  |
| Q#8 - >CPIJ009568/Cqu  | CquiOBP8  | superfamily                                     | 209365     | 20   | 139 | 4.93E-19 | 77.9935  | cl11600   | PBP_GOBP superfamily | -          | -           |  |
| Q#9 - >CPIJ016948/Cqu  | CquiOBP9  | specific                                        | 201769     | 12   | 134 | 2.70E-14 | 64.8967  | pfam01395 | PBP_GOBP             | -          | cl11600     |  |
| Q#9 - >CPIJ016948/Cqu  | CquiOBP9  | superfamily                                     | 209365     | 12   | 134 | 2.70E-14 | 64.8967  | cl11600   | PBP_GOBP superfamily | -          | -           |  |
| Q#10 - >CPIJ013976/Cqu | CquiOBP10 | specific                                        | 201769     | 8    | 127 | 1.00E-15 | 68.7487  | pfam01395 | PBP_GOBP             | -          | cl11600     |  |
| Q#10 - >CPIJ013976/Cqu | CquiOBP10 | superfamily                                     | 209365     | 8    | 127 | 1.00E-15 | 68.7487  | cl11600   | PBP_GOBP superfamily | -          | -           |  |
| Q#11 - >CPIJ006551/Cqu | CquiOBP11 | specific                                        | 201769     | 25   | 139 | 8.70E-20 | 79.9195  | pfam01395 | PBP_GOBP             | -          | cl11600     |  |
| Q#11 - >CPIJ006551/Cqu | CquiOBP11 | superfamily                                     | 209365     | 25   | 139 | 8.70E-20 | 79.9195  | cl11600   | PBP_GOBP superfamily | -          | -           |  |
| Q#12 - >CPIJ016949/Cqu | CquiOBP12 | specific                                        | 201769     | 12   | 134 | 2.70E-14 | 64.8967  | pfam01395 | PBP_GOBP             | -          | cl11600     |  |
| Q#12 - >CPIJ016949/Cqu | CquiOBP12 | superfamily                                     | 209365     | 12   | 134 | 2.70E-14 | 64.8967  | cl11600   | PBP_GOBP superfamily | -          | -           |  |
| Q#13 - >CPIJ016952/Cqu | CquiOBP13 | specific                                        | 201769     | 12   | 134 | 2.70E-14 | 64.8967  | pfam01395 | PBP_GOBP             | -          | cl11600     |  |
| Q#13 - >CPIJ016952/Cqu | CquiOBP13 | superfamily                                     | 209365     | 12   | 134 | 2.70E-14 | 64.8967  | cl11600   | PBP_GOBP superfamily | -          | -           |  |
| Q#14 - >CPIJ009586/Cqu | CquiOBP14 | specific                                        | 201769     | 59   | 154 | 3.89E-12 | 59.1187  | pfam01395 | PBP_GOBP             | -          | cl11600     |  |
| Q#14 - >CPIJ009586/Cqu | CquiOBP14 | superfamily                                     | 209365     | 59   | 154 | 3.89E-12 | 59.1187  | cl11600   | PBP_GOBP superfamily | -          | -           |  |
| Q#15 - >CPIJ012714/Cqu | CquiOBP15 | specific                                        | 201769     | 29   | 132 | 6.26E-17 | 72.2155  | pfam01395 | PBP_GOBP             | -          | cl11600     |  |
| Q#15 - >CPIJ012714/Cqu | CquiOBP15 | superfamily                                     | 209365     | 29   | 132 | 6.26E-17 | 72.2155  | cl11600   | PBP_GOBP superfamily | -          | -           |  |

**Supplementary Table 4c.** CDD domain predictions for *Classic* OBPs from *Culex quinquefasciatus*.

|                       |           |             |        |    |     |          |         |           |                      |   |         |
|-----------------------|-----------|-------------|--------|----|-----|----------|---------|-----------|----------------------|---|---------|
| Q#16 ->CPIJ012715/Cqu | CquiOBP16 | specific    | 201769 | 21 | 124 | 2.38E-17 | 72.9859 | pfam01395 | PBP_GOBP             | - | cl11600 |
| Q#16 ->CPIJ012715/Cqu | CquiOBP16 | superfamily | 209365 | 21 | 124 | 2.38E-17 | 72.9859 | cl11600   | PBP_GOBP superfamily | - | -       |
| Q#17 ->CPIJ012716/Cqu | CquiOBP17 | specific    | 201769 | 9  | 128 | 9.63E-29 | 103.031 | pfam01395 | PBP_GOBP             | - | cl11600 |
| Q#17 ->CPIJ012716/Cqu | CquiOBP17 | superfamily | 209365 | 9  | 128 | 9.63E-29 | 103.031 | cl11600   | PBP_GOBP superfamily | - | -       |
| Q#18 ->CPIJ012717/Cqu | CquiOBP18 | specific    | 201769 | 20 | 128 | 2.42E-20 | 81.0751 | pfam01395 | PBP_GOBP             | - | cl11600 |
| Q#18 ->CPIJ012717/Cqu | CquiOBP18 | superfamily | 209365 | 20 | 128 | 2.42E-20 | 81.0751 | cl11600   | PBP_GOBP superfamily | - | -       |
| Q#19 ->CPIJ012718/Cqu | CquiOBP19 | specific    | 201769 | 36 | 135 | 1.46E-20 | 81.8455 | pfam01395 | PBP_GOBP             | - | cl11600 |
| Q#19 ->CPIJ012718/Cqu | CquiOBP19 | superfamily | 209365 | 36 | 135 | 1.46E-20 | 81.8455 | cl11600   | PBP_GOBP superfamily | - | -       |
| Q#20 ->CPIJ012719/Cqu | CquiOBP20 | specific    | 201769 | 22 | 127 | 5.54E-24 | 90.3199 | pfam01395 | PBP_GOBP             | - | cl11600 |
| Q#20 ->CPIJ012719/Cqu | CquiOBP20 | superfamily | 209365 | 22 | 127 | 5.54E-24 | 90.3199 | cl11600   | PBP_GOBP superfamily | - | -       |
| Q#21 ->CPIJ012720/Cqu | CquiOBP21 | specific    | 201769 | 23 | 131 | 5.35E-08 | 46.7923 | pfam01395 | PBP_GOBP             | - | cl11600 |
| Q#21 ->CPIJ012720/Cqu | CquiOBP21 | superfamily | 209365 | 23 | 131 | 5.35E-08 | 46.7923 | cl11600   | PBP_GOBP superfamily | - | -       |
| Q#22 ->CPIJ012721/Cqu | CquiOBP22 | specific    | 201769 | 10 | 129 | 1.72E-19 | 78.7639 | pfam01395 | PBP_GOBP             | - | cl11600 |
| Q#22 ->CPIJ012721/Cqu | CquiOBP22 | superfamily | 209365 | 10 | 129 | 1.72E-19 | 78.7639 | cl11600   | PBP_GOBP superfamily | - | -       |
| Q#23 ->CPIJ001876/Cqu | CquiOBP23 | specific    | 201769 | 9  | 131 | 1.62E-15 | 67.9783 | pfam01395 | PBP_GOBP             | - | cl11600 |
| Q#23 ->CPIJ001876/Cqu | CquiOBP23 | superfamily | 209365 | 9  | 131 | 1.62E-15 | 67.9783 | cl11600   | PBP_GOBP superfamily | - | -       |
| Q#24 ->CPIJ014525/Cqu | CquiOBP24 | specific    | 201769 | 31 | 133 | 5.80E-21 | 82.6159 | pfam01395 | PBP_GOBP             | - | cl11600 |
| Q#24 ->CPIJ014525/Cqu | CquiOBP24 | superfamily | 209365 | 31 | 133 | 5.80E-21 | 82.6159 | cl11600   | PBP_GOBP superfamily | - | -       |
| Q#25 ->CPIJ010723/Cqu | CquiOBP25 | specific    | 201769 | 13 | 120 | 4.52E-07 | 43.7107 | pfam01395 | PBP_GOBP             | - | cl11600 |
| Q#25 ->CPIJ010723/Cqu | CquiOBP25 | superfamily | 209365 | 13 | 120 | 4.52E-07 | 43.7107 | cl11600   | PBP_GOBP superfamily | - | -       |
| Q#26 ->CPIJ010724/Cqu | CquiOBP26 | specific    | 201769 | 23 | 118 | 2.36E-11 | 56.0371 | pfam01395 | PBP_GOBP             | - | cl11600 |
| Q#26 ->CPIJ010724/Cqu | CquiOBP26 | superfamily | 209365 | 23 | 118 | 2.36E-11 | 56.0371 | cl11600   | PBP_GOBP superfamily | - | -       |
| Q#27 ->CPIJ010728/Cqu | CquiOBP27 | specific    | 201769 | 24 | 123 | 7.00E-09 | 49.1035 | pfam01395 | PBP_GOBP             | - | cl11600 |
| Q#27 ->CPIJ010728/Cqu | CquiOBP27 | superfamily | 209365 | 24 | 123 | 7.00E-09 | 49.1035 | cl11600   | PBP_GOBP superfamily | - | -       |
| Q#28 ->CPIJ016965/Cqu | CquiOBP28 | specific    | 201769 | 31 | 139 | 1.94E-11 | 56.8075 | pfam01395 | PBP_GOBP             | - | cl11600 |
| Q#28 ->CPIJ016965/Cqu | CquiOBP28 | superfamily | 209365 | 31 | 139 | 1.94E-11 | 56.8075 | cl11600   | PBP_GOBP superfamily | - | -       |
| Q#29 ->CPIJ016966/Cqu | CquiOBP29 | specific    | 201769 | 20 | 118 | 2.82E-11 | 56.0371 | pfam01395 | PBP_GOBP             | - | cl11600 |
| Q#29 ->CPIJ016966/Cqu | CquiOBP29 | superfamily | 209365 | 20 | 118 | 2.82E-11 | 56.0371 | cl11600   | PBP_GOBP superfamily | - | -       |
| Q#30 ->CPIJ016967/Cqu | CquiOBP30 | specific    | 201769 | 24 | 132 | 3.26E-07 | 44.8663 | pfam01395 | PBP_GOBP             | - | cl11600 |
| Q#30 ->CPIJ016967/Cqu | CquiOBP30 | superfamily | 209365 | 24 | 132 | 3.26E-07 | 44.8663 | cl11600   | PBP_GOBP superfamily | - | -       |
| Q#31 ->CPIJ008285/Cqu | CquiOBP31 | specific    | 201769 | 5  | 118 | 6.29E-14 | 63.3559 | pfam01395 | PBP_GOBP             | - | cl11600 |
| Q#31 ->CPIJ008285/Cqu | CquiOBP31 | superfamily | 209365 | 5  | 118 | 6.29E-14 | 63.3559 | cl11600   | PBP_GOBP superfamily | - | -       |
| Q#32 ->CPIJ016479/Cqu | CquiOBP32 | specific    | 201769 | 25 | 124 | 5.42E-13 | 61.0447 | pfam01395 | PBP_GOBP             | - | cl11600 |
| Q#32 ->CPIJ016479/Cqu | CquiOBP32 | superfamily | 209365 | 25 | 124 | 5.42E-13 | 61.0447 | cl11600   | PBP_GOBP superfamily | - | -       |
| Q#33 ->CPIJ019607/Cqu | CquiOBP33 | specific    | 201769 | 20 | 122 | 3.30E-11 | 55.6519 | pfam01395 | PBP_GOBP             | - | cl11600 |
| Q#33 ->CPIJ019607/Cqu | CquiOBP33 | superfamily | 209365 | 20 | 122 | 3.30E-11 | 55.6519 | cl11600   | PBP_GOBP superfamily | - | -       |

**Supplementary Table 4c.** CDD domain predictions for *Classic* OBPs from *Culex quinquefasciatus*.

|                        |           |             |        |     |     |           |         |           |                      |   |         |
|------------------------|-----------|-------------|--------|-----|-----|-----------|---------|-----------|----------------------|---|---------|
| Q#34 - >CPIJ019608/Cqu | CquiOBP34 | specific    | 201769 | 6   | 110 | 4.11E-11  | 55.2667 | pfam01395 | PBP_GOBP             | - | cl11600 |
| Q#34 - >CPIJ019608/Cqu | CquiOBP34 | superfamily | 209365 | 6   | 110 | 4.11E-11  | 55.2667 | cl11600   | PBP_GOBP superfamily | - | -       |
| Q#35 - >CPIJ019609/Cqu | CquiOBP35 | specific    | 201769 | 13  | 122 | 4.90E-09  | 49.4887 | pfam01395 | PBP_GOBP             | - | cl11600 |
| Q#35 - >CPIJ019609/Cqu | CquiOBP35 | superfamily | 209365 | 13  | 122 | 4.90E-09  | 49.4887 | cl11600   | PBP_GOBP superfamily | - | -       |
| Q#36 - >CPIJ019610/Cqu | CquiOBP36 | specific    | 201769 | 23  | 136 | 5.49E-07  | 44.0959 | pfam01395 | PBP_GOBP             | - | cl11600 |
| Q#36 - >CPIJ019610/Cqu | CquiOBP36 | superfamily | 209365 | 23  | 136 | 5.49E-07  | 44.0959 | cl11600   | PBP_GOBP superfamily | - | -       |
| Q#37 - >CPIJ007931/Cqu | CquiOBP37 | specific    | 201769 | 11  | 119 | 1.10E-08  | 48.7183 | pfam01395 | PBP_GOBP             | - | cl11600 |
| Q#37 - >CPIJ007931/Cqu | CquiOBP37 | superfamily | 209365 | 11  | 119 | 1.10E-08  | 48.7183 | cl11600   | PBP_GOBP superfamily | - | -       |
| Q#38 - >CPIJ007932/Cqu | CquiOBP38 | specific    | 201769 | 16  | 127 | 1.91E-07  | 45.2515 | pfam01395 | PBP_GOBP             | - | cl11600 |
| Q#38 - >CPIJ007932/Cqu | CquiOBP38 | superfamily | 209365 | 16  | 127 | 1.91E-07  | 45.2515 | cl11600   | PBP_GOBP superfamily | - | -       |
| Q#39 - >CPIJ007933/Cqu | CquiOBP39 | specific    | 201769 | 3   | 122 | 2.15E-09  | 50.6443 | pfam01395 | PBP_GOBP             | - | cl11600 |
| Q#39 - >CPIJ007933/Cqu | CquiOBP39 | superfamily | 209365 | 3   | 122 | 2.15E-09  | 50.6443 | cl11600   | PBP_GOBP superfamily | - | -       |
| Q#40 - >CPIJ007934/Cqu | CquiOBP40 | specific    | 201769 | 3   | 101 | 4.95E-10  | 52.1851 | pfam01395 | PBP_GOBP             | - | cl11600 |
| Q#40 - >CPIJ007934/Cqu | CquiOBP40 | superfamily | 209365 | 3   | 101 | 4.95E-10  | 52.1851 | cl11600   | PBP_GOBP superfamily | - | -       |
| Q#41 - >CPIJ007935/Cqu | CquiOBP41 | specific    | 201769 | 1   | 97  | 4.92E-10  | 51.7999 | pfam01395 | PBP_GOBP             | N | cl11600 |
| Q#41 - >CPIJ007935/Cqu | CquiOBP41 | superfamily | 209365 | 1   | 97  | 4.92E-10  | 51.7999 | cl11600   | PBP_GOBP superfamily | N | -       |
| Q#42 - >CPIJ007936/Cqu | CquiOBP42 | specific    | 201769 | 8   | 111 | 1.94E-10  | 53.3407 | pfam01395 | PBP_GOBP             | - | cl11600 |
| Q#42 - >CPIJ007936/Cqu | CquiOBP42 | superfamily | 209365 | 8   | 111 | 1.94E-10  | 53.3407 | cl11600   | PBP_GOBP superfamily | - | -       |
| Q#43 - >CPIJ017326/Cqu | CquiOBP43 | specific    | 201769 | 13  | 128 | 8.80E-27  | 98.0239 | pfam01395 | PBP_GOBP             | - | cl11600 |
| Q#43 - >CPIJ017326/Cqu | CquiOBP43 | superfamily | 209365 | 13  | 128 | 8.80E-27  | 98.0239 | cl11600   | PBP_GOBP superfamily | - | -       |
| Q#44 - >CPIJ009937/Cqu | CquiOBP44 | specific    | 201769 | 23  | 135 | 5.57E-18  | 74.9119 | pfam01395 | PBP_GOBP             | - | cl11600 |
| Q#44 - >CPIJ009937/Cqu | CquiOBP44 | superfamily | 209365 | 23  | 135 | 5.57E-18  | 74.9119 | cl11600   | PBP_GOBP superfamily | - | -       |
| Q#45 - >CPIJ010782/Cqu | CquiOBP46 | specific    | 201769 | 20  | 139 | 1.33E-16  | 71.4451 | pfam01395 | PBP_GOBP             | - | cl11600 |
| Q#45 - >CPIJ010782/Cqu | CquiOBP46 | superfamily | 209365 | 20  | 139 | 1.33E-16  | 71.4451 | cl11600   | PBP_GOBP superfamily | - | -       |
| Q#46 - >CPIJ010787/Cqu | CquiOBP51 | specific    | 201769 | 25  | 131 | 4.34E-14  | 64.5115 | pfam01395 | PBP_GOBP             | - | cl11600 |
| Q#46 - >CPIJ010787/Cqu | CquiOBP51 | superfamily | 209365 | 25  | 131 | 4.34E-14  | 64.5115 | cl11600   | PBP_GOBP superfamily | - | -       |
| Q#47 - >CPIJ010788/Cqu | CquiOBP52 | specific    | 201769 | 11  | 129 | 9.32E-16  | 69.1339 | pfam01395 | PBP_GOBP             | - | cl11600 |
| Q#47 - >CPIJ010788/Cqu | CquiOBP52 | superfamily | 209365 | 11  | 129 | 9.32E-16  | 69.1339 | cl11600   | PBP_GOBP superfamily | - | -       |
| Q#48 - >CPIJ010789/Cqu | CquiOBP53 | specific    | 201769 | 18  | 127 | 1.09E-11  | 57.5779 | pfam01395 | PBP_GOBP             | - | cl11600 |
| Q#48 - >CPIJ010789/Cqu | CquiOBP53 | superfamily | 209365 | 18  | 127 | 1.09E-11  | 57.5779 | cl11600   | PBP_GOBP superfamily | - | -       |
| Q#49 - >CPIJ007937/Cqu | CquiOBP54 | specific    | 201769 | 65  | 168 | 4.27E-12  | 59.1187 | pfam01395 | PBP_GOBP             | - | cl11600 |
| Q#49 - >CPIJ007937/Cqu | CquiOBP54 | superfamily | 209365 | 65  | 168 | 4.27E-12  | 59.1187 | cl11600   | PBP_GOBP superfamily | - | -       |
| Q#50 - >CPIJ010367/Cqu | CquiOBP55 | specific    | 201769 | 146 | 217 | 0.0001834 | 38.7031 | pfam01395 | PBP_GOBP             | N | cl11600 |
| Q#50 - >CPIJ010367/Cqu | CquiOBP55 | superfamily | 209365 | 146 | 217 | 0.0001834 | 38.7031 | cl11600   | PBP_GOBP superfamily | N | -       |
| Q#51 - >CPIJ010729/Cqu | CquiOBP56 | specific    | 201769 | 6   | 100 | 7.79E-07  | 45.2515 | pfam01395 | PBP_GOBP             | - | cl11600 |
| Q#51 - >CPIJ010729/Cqu | CquiOBP56 | superfamily | 209365 | 6   | 100 | 7.79E-07  | 45.2515 | cl11600   | PBP_GOBP superfamily | - | -       |

**Supplementary Table 4c.** CDD domain predictions for *Classic* OBPs from *Culex quinquefasciatus*.

|                       |           |             |        |    |     |          |         |            |                      |   |         |
|-----------------------|-----------|-------------|--------|----|-----|----------|---------|------------|----------------------|---|---------|
| Q#52 ->CPIJ016951/Cqu | CquiOBP57 | specific    | 201769 | 12 | 134 | 2.70E-14 | 64.8967 | pfam01395  | PBP_GOBP             | - | cl11600 |
| Q#52 ->CPIJ016951/Cqu | CquiOBP57 | superfamily | 209365 | 12 | 134 | 2.70E-14 | 64.8967 | cl11600    | PBP_GOBP superfamily | - | -       |
| Q#54 ->CPIJ007609/Cqu | CquiOBP58 | specific    | 201769 | 12 | 107 | 3.12E-14 | 64.1263 | pfam01395  | PBP_GOBP             | N | cl11600 |
| Q#54 ->CPIJ007609/Cqu | CquiOBP58 | superfamily | 209365 | 12 | 107 | 3.12E-14 | 64.1263 | cl11600    | PBP_GOBP superfamily | N | -       |
| Q#55 ->CPIJ001871/Cqu | CquiOBP59 | specific    | 197837 | 31 | 133 | 9.15E-08 | 45.8828 | smart00708 | PhBP                 | - | cl11600 |
| Q#55 ->CPIJ001871/Cqu | CquiOBP59 | superfamily | 209365 | 31 | 133 | 9.15E-08 | 45.8828 | cl11600    | PBP_GOBP superfamily | - | -       |
| Q#56 ->CPIJ012786/Cqu | CquiOBP60 | specific    | 201769 | 10 | 134 | 4.20E-07 | 44.4811 | pfam01395  | PBP_GOBP             | - | cl11600 |
| Q#56 ->CPIJ012786/Cqu | CquiOBP60 | superfamily | 209365 | 10 | 134 | 4.20E-07 | 44.4811 | cl11600    | PBP_GOBP superfamily | - | -       |
| Q#57 ->CPIJ015943/Cqu | CquiOBP61 | specific    | 201769 | 3  | 117 | 3.90E-08 | 46.7923 | pfam01395  | PBP_GOBP             | - | cl11600 |
| Q#57 ->CPIJ015943/Cqu | CquiOBP61 | superfamily | 209365 | 3  | 117 | 3.90E-08 | 46.7923 | cl11600    | PBP_GOBP superfamily | - | -       |
| Q#58 ->CPIJ015944/Cqu | CquiOBP62 | specific    | 201769 | 55 | 177 | 7.59E-11 | 55.6519 | pfam01395  | PBP_GOBP             | - | cl11600 |
| Q#58 ->CPIJ015944/Cqu | CquiOBP62 | superfamily | 209365 | 55 | 177 | 7.59E-11 | 55.6519 | cl11600    | PBP_GOBP superfamily | - | -       |
| Q#59 ->CPIJ016343/Cqu | CquiOBP63 | specific    | 201769 | 31 | 155 | 9.46E-12 | 58.7335 | pfam01395  | PBP_GOBP             | - | cl11600 |
| Q#59 ->CPIJ016343/Cqu | CquiOBP63 | superfamily | 209365 | 31 | 155 | 9.46E-12 | 58.7335 | cl11600    | PBP_GOBP superfamily | - | -       |
| Q#60 ->CPIJ004145/Cqu | CquiOBP64 | specific    | 201769 | 12 | 132 | 3.65E-09 | 50.2591 | pfam01395  | PBP_GOBP             | - | cl11600 |
| Q#60 ->CPIJ004145/Cqu | CquiOBP64 | superfamily | 209365 | 12 | 132 | 3.65E-09 | 50.2591 | cl11600    | PBP_GOBP superfamily | - | -       |
| Q#61 ->CPIJ001875/Cqu | CquiOBP65 | specific    | 201769 | 16 | 133 | 2.76E-12 | 59.1187 | pfam01395  | PBP_GOBP             | - | cl11600 |
| Q#61 ->CPIJ001875/Cqu | CquiOBP65 | superfamily | 209365 | 16 | 133 | 2.76E-12 | 59.1187 | cl11600    | PBP_GOBP superfamily | - | -       |
| Q#62 ->CPIJ001865/Cqu | CquiOBP66 | specific    | 201769 | 9  | 127 | 2.80E-11 | 56.0371 | pfam01395  | PBP_GOBP             | - | cl11600 |
| Q#62 ->CPIJ001865/Cqu | CquiOBP66 | superfamily | 209365 | 9  | 127 | 2.80E-11 | 56.0371 | cl11600    | PBP_GOBP superfamily | - | -       |
| Q#63 ->CPIJ017432/Cqu | CquiOBP67 | specific    | 201769 | 1  | 117 | 1.96E-10 | 53.3407 | pfam01395  | PBP_GOBP             | - | cl11600 |
| Q#63 ->CPIJ017432/Cqu | CquiOBP67 | superfamily | 209365 | 1  | 117 | 1.96E-10 | 53.3407 | cl11600    | PBP_GOBP superfamily | - | -       |
| Q#64 ->CPIJ001873/Cqu | CquiOBP68 | specific    | 201769 | 20 | 133 | 2.01E-12 | 59.5039 | pfam01395  | PBP_GOBP             | - | cl11600 |
| Q#64 ->CPIJ001873/Cqu | CquiOBP68 | superfamily | 209365 | 20 | 133 | 2.01E-12 | 59.5039 | cl11600    | PBP_GOBP superfamily | - | -       |
| Q#65 ->CPIJ001874/Cqu | CquiOBP69 | specific    | 201769 | 2  | 118 | 1.98E-13 | 61.8151 | pfam01395  | PBP_GOBP             | - | cl11600 |
| Q#65 ->CPIJ001874/Cqu | CquiOBP69 | superfamily | 209365 | 2  | 118 | 1.98E-13 | 61.8151 | cl11600    | PBP_GOBP superfamily | - | -       |
| Q#66 ->CPIJ001872/Cqu | CquiOBP70 | specific    | 201769 | 11 | 129 | 4.21E-14 | 64.1263 | pfam01395  | PBP_GOBP             | - | cl11600 |
| Q#66 ->CPIJ001872/Cqu | CquiOBP70 | superfamily | 209365 | 11 | 129 | 4.21E-14 | 64.1263 | cl11600    | PBP_GOBP superfamily | - | -       |
| Q#67 ->CPIJ001870/Cqu | CquiOBP71 | specific    | 201769 | 9  | 125 | 5.56E-11 | 55.2667 | pfam01395  | PBP_GOBP             | - | cl11600 |
| Q#67 ->CPIJ001870/Cqu | CquiOBP71 | superfamily | 209365 | 9  | 125 | 5.56E-11 | 55.2667 | cl11600    | PBP_GOBP superfamily | - | -       |
| Q#68 ->CPIJ001867/Cqu | CquiOBP72 | specific    | 201769 | 18 | 90  | 5.69E-09 | 48.7183 | pfam01395  | PBP_GOBP             | N | cl11600 |
| Q#68 ->CPIJ001867/Cqu | CquiOBP72 | superfamily | 209365 | 18 | 90  | 5.69E-09 | 48.7183 | cl11600    | PBP_GOBP superfamily | N | -       |
| Q#69 ->CPIJ001869/Cqu | CquiOBP73 | specific    | 201769 | 9  | 128 | 2.55E-11 | 56.4223 | pfam01395  | PBP_GOBP             | - | cl11600 |
| Q#69 ->CPIJ001869/Cqu | CquiOBP73 | superfamily | 209365 | 9  | 128 | 2.55E-11 | 56.4223 | cl11600    | PBP_GOBP superfamily | - | -       |
| Q#70 ->CPIJ001868/Cqu | CquiOBP74 | specific    | 201769 | 12 | 122 | 5.45E-09 | 49.4887 | pfam01395  | PBP_GOBP             | - | cl11600 |
| Q#70 ->CPIJ001868/Cqu | CquiOBP74 | superfamily | 209365 | 12 | 122 | 5.45E-09 | 49.4887 | cl11600    | PBP_GOBP superfamily | - | -       |
